1  
2  
3  
4  
5  
6  
7  
8  
9  
10  
11  
12  
13  
14  
15  
16  
17  
18  
19  
20  
21  
22  
23  
24  
25  
26  
27  
28  
29  
30  
31  
32  
33  
34  
35

**The gag-like gene *RTL8* antagonizes PEG10-mediated virus like particles in humans**

Will Campodonico<sup>1</sup>, Holly H. Black<sup>1</sup>, Cristina I. Lau<sup>1</sup>, and Alexandra M. Whiteley<sup>1</sup>

<sup>1</sup>Department of Biochemistry, University of Colorado, Boulder, CO, USA

\*e-mail: alexandra.whiteley@colorado.edu

1 **Abstract**

2 Transposable elements can cause catastrophic genomic instability and are tightly regulated by the host  
3 through multiple restriction pathways. Domesticated elements are derived from these ancestors and  
4 have evolved adaptive roles but may retain pathological activity. For example, *PEG10* is required for  
5 placentation but also promotes cancer and neurodegeneration. While much of *PEG10* remains poorly  
6 understood, a unique feature is its ability to readily form virus-like particles (VLPs) which may contribute  
7 to its adaptive and pathological nature. However, comparable restriction networks that antagonize the  
8 harmful potential of domesticated genes like *PEG10* remain unknown. Here, we describe restriction of  
9 *PEG10* VLP abundance via *UBQLN2* and the domesticated retrotransposon *RTL8*. The gag-like *RTL8*  
10 antagonizes *PEG10* through competitive incorporation into VLPs reminiscent of transposable element  
11 inhibitors from diverse eukaryotes. These results represent the first known instance of a retroelement-  
12 derived restriction factor antagonizing another domesticated retrotransposon and have implications for  
13 our understanding of *PEG10* biology.

## 1 **Introduction**

2 Transposable elements (TEs), which include DNA transposons and RNA retrotransposons, are virus-like  
3 genetic elements capable of replicating within the genome through a variety of complex mechanisms.  
4 Due to the catastrophic consequences of unchecked genomic integration, eukaryotes have developed  
5 extensive networks to restrict transposable element expression and activity<sup>1</sup>. These restriction  
6 mechanisms act at transcriptional, translational, and post-translational stages of the TE lifecycle, and  
7 are found in diverse eukaryotes from yeast to humans<sup>1</sup>. Inhibition or loss of these restriction factors  
8 results in elevated TE activity<sup>2,3</sup>, which can result in genomic instability and human disease.

9  
10 Rather than being restricted by host factors, expression of a subset of TE-derived genes is essential for  
11 organismal health<sup>4</sup>. These genes are referred to as ‘domesticated’<sup>4,5</sup> and have a variety of adaptive roles,  
12 including the maintenance of genomic integrity<sup>6,7</sup>, development<sup>5</sup>, and viral restriction<sup>8-10</sup>. However,  
13 despite the selective pressure towards host fitness, recent studies have shown that a subset of these  
14 domesticated elements retain pathological effects and can directly contribute to human disease<sup>6,11,12</sup>.  
15 Therefore, it would be advantageous for the host to use the same, or adapted TE restriction factors to  
16 regulate their domesticated counterparts. However, no such restriction factors of domesticated  
17 elements have been identified.

18  
19 The domesticated retrotransposon *Paternally Expressed Gene 10 (PEG10)* embodies a balance between  
20 adaptation and pathology: *PEG10* is necessary for placentation in mice<sup>13,14</sup>, but also drives cancer and  
21 neurological disease in humans<sup>15-19</sup>. The mechanisms of *PEG10*-mediated adaptive and pathological  
22 roles remain poorly understood, but may involve the protein’s rare ability to form virus-like particles  
23 (VLPs) that are exported from the cell<sup>20-22</sup>. For the domesticated gene *Arc*, formation and release of a  
24 VLP is essential to its adaptive function in the organism<sup>23,24</sup>. Like *Arc*, *PEG10*-derived VLPs may  
25 contribute to either its adaptive or pathological roles.

26  
27 Here, we describe a multifaceted regulatory network that antagonizes *PEG10* VLP formation and release  
28 from human cells. It was recently discovered that the proteasome shuttle factor ubiquilin 2 (UBQLN2)  
29 selectively targets *PEG10* for degradation<sup>18</sup>, and here we show that this translates to decreased VLP  
30 abundance. We also describe a novel role for the human gene *RTL8*, a domesticated retrotransposon  
31 with structural similarity to the N-terminal lobe of *PEG10 gag*<sup>25</sup>, in the restriction of *PEG10*-derived VLPs.  
32 *RTL8* binds to the *PEG10* N-terminal lobe, is found in *PEG10* VLPs, and causes *PEG10* to be retained  
33 in the cell. Together, these findings suggest a model in which *RTL8* competitively incorporates into  
34 *PEG10* VLPs, thereby inhibiting their assembly or release. *RTL8*’s restriction of *PEG10* appears to be  
35 species-specific, suggesting that the two domesticated retroelements co-evolved in conflict. These  
36 results illuminate a new role for *RTL8* in the inhibition of *PEG10* activity and may have important

1 implications for reproductive and neurological health. These results also identify a novel conflict between  
2 two domesticated retrotransposons in the human genome and highlight the unique demands of  
3 balancing beneficial and detrimental roles of TEs and TE-derived genes.

## 5 **Results**

### 6 *PEG10 spontaneously releases virus-like particles in human cell lines*

7 TEs come in many forms, with diverse genetic structures and mechanisms of propagation<sup>4,26,27</sup>. *PEG10*  
8 evolved from the Ty3/*gypsy* family<sup>25</sup> of LTR retrotransposons that replicate through an RNA intermediate  
9 and encode a classical *gag-pol* genetic structure. Like its ancestors, *PEG10* retains an intact *gag* and  
10 partial *pol* open reading frame and utilizes a programmed -1 ribosomal frameshift to allow for translation  
11 of both *gag* and *gag-pol* polyproteins from a single transcript (Fig. 1a)<sup>28,29</sup>. The *gag* open reading frame  
12 codes for the structural capsid and nucleic acid-binding zinc finger (NC)<sup>20,21,30</sup>. The *pol* open reading  
13 frame codes for an aspartic protease (PR) but lacks the reverse transcriptase (RT), RNase (RH), and  
14 integrase (IN) domains necessary for genomic reincorporation (Fig. 1a)<sup>25</sup>.

15  
16 Expression of *PEG10 gag* and *gag-pol* in cells results in the release of VLPs into cell culture medium<sup>20-</sup>  
17 <sup>22</sup>. The contribution of *PEG10*-derived VLPs to the adaptive and pathological roles of *PEG10* remains  
18 unclear; however, they have been engineered for the production of RNA-containing particles that can  
19 deliver functional nucleic acid to human cells<sup>21</sup>. In both cases, the factors that regulate *PEG10*-derived  
20 VLP production and release are unknown. To better understand *PEG10* VLP production in a native  
21 context, we quantified VLP abundance in conditioned medium from a range of cultured human cell lines.  
22 We tested the abundance of *PEG10* in cell lysate (Fig. 1b,d) and conditioned medium (Fig. 1c,e) following  
23 enrichment of extracellular particles by ultracentrifugation. *PEG10* abundance in lysate and the VLP  
24 fraction was measured by western blot using a polyclonal antibody generated against *PEG10 gag*,  
25 allowing us to separately quantify the abundance of *gag* and *gag-pol* proteins, as well as their respective  
26 contribution to VLPs, in each cell line.

27  
28 All cell lines expressed detectable levels of *PEG10 gag* and *gag-pol* protein (Fig. 1b,d). The  
29 hepatocellular carcinoma HepG2 and the human trophoblast hTR-8 cells had a significantly higher ratio  
30 of *gag-pol:gag* protein than other lines tested (Extended Data Fig. 1a), which could be caused by unique  
31 regulation of *PEG10*'s frameshifting or differential stability of the two products in the cells.

32  
33 In contrast to cell lysate, *gag* and *gag-pol* proteins were only detectable in the VLP fraction of some cell  
34 lines (Fig. 1c,e). HepG2 cells had the highest lysate abundance and VLP production of all cell lines tested  
35 (Fig. 1b-e). However, across all cell lines, lysate *PEG10* only correlated weakly with VLP abundance  
36 (Extended Data Fig. 1b). For example, hTR-8 cells had significantly less *PEG10* in lysate (Fig. 1b,d) but

1 nearly identical VLP abundance compared to HepG2 cells (Fig. 1c,e). The remaining cell lines (HEK293,  
2 A549, and U87) had comparable PEG10 abundance in cell lysate to hTR-8 cells, but negligible VLP  
3 abundance (Fig. 1c,e).

4

5 Elevated PEG10 protein expression has been implicated in the neurodegenerative disease Amyotrophic  
6 Lateral Sclerosis (ALS) and the neurodevelopmental disease Angelman syndrome<sup>18,19,22</sup>. In both  
7 conditions, primary cultured neurons are commonly used as a model of cellular dysfunction. We tested  
8 for PEG10 VLPs in conditioned media from human iPSC-derived neurons and observed a strong PEG10  
9 gag band (Extended Data Fig. 2), though the presence of a cytoplasmic control band means that we  
10 cannot rule out the possibility of contamination with nonspecific cellular fragments.

11

### 12 *UBQLN2 regulates PEG10 gag-pol abundance and VLP release in a human trophoblast cell line*

13 Elevation of the ratio of gag-pol:gag protein levels in HepG2 and hTR-8 cells, paired with the enhanced  
14 VLP abundance in these cell lines, suggested that a component of the pol open reading frame may  
15 increase the efficiency of PEG10-derived VLP formation and/or release. Recent studies have shown that  
16 the proteasome shuttle factor ubiquilin 2 (UBQLN2) specifically regulates the abundance of PEG10 gag-  
17 pol, but not gag, by targeting the protein for proteasomal degradation<sup>18,22</sup>. To test whether UBQLN2  
18 similarly restricts VLP abundance, we stably introduced shRNAs targeting *UBQLN2* to HepG2 and hTR-  
19 8 cells (Fig. 2a,b, Extended Data Fig. 3a,b). Consistent with previous work<sup>18</sup>, knockdown of *UBQLN2* in  
20 hTR-8 cells led to a greater than two-fold increase in PEG10 gag-pol abundance in cell lysate, with no  
21 significant change to gag abundance (Fig. 2a,c-d). In hTR-8 cells, knockdown of *UBQLN2* also resulted  
22 in a two-fold increase in VLP abundance (Fig. 2e,f). Depletion of *UBQLN2* in HepG2 cells did not result  
23 in changes to gag-pol or gag in cell lysate, or PEG10 VLP abundance (Extended Data Fig. 3), which may  
24 be due to a large excess of PEG10, or additional regulatory factors masking a UBQLN2-dependent  
25 effect.

26

### 27 *PEG10 is a regulatory intermediate between UBQLN2 and RTL8*

28 *UBQLN2* has also been reported to share a functional relationship with *RTL8*, a domesticated  
29 retrotransposon that resembles *PEG10*<sup>18,31</sup>. Like *PEG10*, *RTL8* is a member of the Mart (or Mar) family  
30 of domesticated retrotransposons derived from the Ty3/*gypsy* lineage<sup>25</sup>. However, *RTL8* consists of a  
31 partial gag gene with high sequence homology to the capsid<sup>NTD</sup> of *PEG10* (Fig. 3a). While the disruption  
32 of *UBQLN2* in mouse tissues and human cells leads to accumulation of PEG10 protein, it simultaneously  
33 results in a profound and unexpected loss in *RTL8* protein levels independent of transcription,  
34 translation, or degradation rates (Fig. 3b)<sup>18</sup>. Similarly, knockdown of *UBQLN2* in hTR-8 cells drove a  
35 50% reduction in *RTL8* abundance with no transcriptional changes (Fig. 3c,e, Extended Data Fig. 4a).  
36 This relationship was more pronounced upon genetic deletion of *UBQLN2* – in a HEK293 cell line lacking

1 *UBQLN 1, 2, and 4* (HEK293<sup>TKO</sup>)<sup>32</sup>, we observed a robust increase in PEG10 gag-pol (Extended Data Fig.  
2 4b) and near complete loss of RTL8 (Fig. 3d,f).

3  
4 The existence of a regulatory relationship between *UBQLN2* and two highly similar genes of the same  
5 domesticated retrotransposon family led us to examine whether *PEG10* and *RTL8* share a direct  
6 relationship in addition to their regulation by *UBQLN2* (Fig. 3b). We introduced an shRNA against *PEG10*  
7 into *UBQLN*<sup>TKO</sup> cells and saw a partial rescue of RTL8 (Fig. 3g, h), confirming that *UBQLN2*'s influence  
8 on RTL8 is at least partially mediated by PEG10.

9  
10 *RTL8 interacts with PEG10 capsid*<sup>NTD-lobe</sup>

11 After confirming that PEG10 is a regulatory intermediate between *UBQLN2* and RTL8, we tested whether  
12 PEG10 and RTL8 interact to mediate this regulation. *RTL8* exists as three nearly identical genes (*RTL8a*,  
13 *b*, and *c*); we expressed HA-PEG10 and FLAG-RTL8c in HEK293 cells and performed crosslinking co-  
14 immunoprecipitation. Both proteins were readily visualized by western blot of cell lysate (Fig. 4a,b). HA-  
15 PEG10 was visible as four distinct bands representing gag-pol, gag, and two self-cleavage products  
16 generated via activity of the PEG10 protease domain<sup>22</sup>. The 37 kDa band represents a retrovirus-like  
17 capsid fragment, and the 22 kDa band reflects a protein fragment consisting of the N-terminal ~100  
18 amino acids of the protein (referred to as 'capsid'<sup>NTD-fragment</sup>). Upon immunoprecipitation of HA-PEG10,  
19 we saw robust co-immunoprecipitation of FLAG-RTL8c (Fig. 4a). When we performed the reciprocal  
20 experiment (IP-FLAG), we observed co-immunoprecipitation of HA-PEG10 gag-pol, gag, and capsid,  
21 but not the shorter proteolytically cleaved capsid<sup>NTD-fragment</sup> (Fig. 4b), indicating that while gag and capsid  
22 are sufficient to interact with RTL8c, the very N-terminal region of PEG10 is insufficient.

23  
24 Retroelement gag proteins have two distinct lobes of the structural capsid (Fig. 1a): the N-terminal  
25 domain (capsid<sup>NTD-lobe</sup>) and C-terminal domain (capsid<sup>CTD-lobe</sup>), each of which contribute specific  
26 multimerization properties to the final capsid structure<sup>33</sup>. During retroelement capsid assembly, NTD  
27 lobes self-associate into penta- and hexameric cones, which are held together by homotypic CTD:CTD  
28 interactions on adjacent cones<sup>33-35</sup>. Based on sequence alignment and structural modeling, PEG10  
29 capsid closely resembles that of the ancestral Ty3 retrotransposon and maintains the N-terminal cone  
30 structure as well as C-terminal dimerization domain (Extended Data Fig. 5a,b). Indeed, recent structural  
31 studies confirm that PEG10 capsid<sup>CTD-lobe</sup> closely resembles ancestral Ty3 capsid and is capable of  
32 dimerization<sup>36</sup>.

33  
34 To more precisely map the interaction between PEG10 and RTL8, we generated PEG10 capsid  
35 truncation constructs representing the N- and C-terminal lobes (HA-capsid<sup>NTD-lobe</sup> and HA-capsid<sup>CTD-lobe</sup>  
36 Fig. 4c), co-expressed these constructs in HEK293 cells with FLAG-RTL8c, and immunoprecipitated

1 FLAG. FLAG-RTL8c interacts with HA-PEG10 gag-pol, gag, and capsid<sup>NTD-lobe</sup>, but not capsid<sup>CTD-lobe</sup> (Fig.  
2 4d, Extended Data Fig. 5c), indicating that capsid<sup>NTD-lobe</sup> is both necessary and sufficient for interaction  
3 with RTL8. Co-immunoprecipitation of HA-gag and HA-capsid<sup>NTD-lobe</sup> with FLAG-RTL8c results in the  
4 appearance of a higher molecular weight band that stains positive for both FLAG and HA (Fig. 4d,  
5 Extended Data Fig. 5c, asterisks). This band is at the correct molecular weight to be the crosslinked  
6 dimer of PEG10 with RTL8, which furthers the hypothesis that these proteins interact in the cell.

7  
8 It was surprising that FLAG-RTL8c was unable to co-immunoprecipitate the small fragment of PEG10  
9 generated upon self-cleavage (capsid<sup>NTD-fragment</sup>) (Fig. 4b) given that the slightly larger HA-capsid<sup>NTD-lobe</sup>  
10 construct was sufficient (Fig. 4d). We have previously predicted with high confidence that PEG10 self-  
11 cleavage within the NTD lobe occurs at amino acid 113-114 and cleavage after the CTD lobe occurs at  
12 amino acids 259-260<sup>22</sup>. We generated capsid truncation constructs that mimic these natural cleavage  
13 events (HA-capsid<sup>NTD-fragment</sup>, amino acids 1-111, and HA-capsid<sup>CTD-fragment</sup>, amino acids 112-259,  
14 Extended Data Fig. 5d) and again immunoprecipitated FLAG-RTL8c upon co-expression. Neither HA-  
15 capsid<sup>NTD-fragment</sup> nor HA-capsid<sup>CTD-fragment</sup> were capable of interaction with FLAG-RTL8c (Extended Data  
16 Fig. 5e), consistent with results in Fig. 4b and suggesting that the entirety of the capsid<sup>NTD-lobe</sup> is  
17 necessary for interaction between PEG10 and RTL8. Based on these data, as well as the structural  
18 homology of PEG10 capsid<sup>NTD-lobe</sup> and RTL8, we conclude that the PEG10:RTL8 interaction resembles  
19 the homotypic capsid NTD:NTD interactions typical of the retroelement capsid assembly process.

#### 21 *RTL8 incorporates into PEG10 VLPs and decreases the efficiency of release*

22 Due to the structural similarity (Fig. 5a) and demonstrated interaction between RTL8 and PEG10 capsid  
23 (Fig. 4), we hypothesized that RTL8 can incorporate into PEG10 VLPs. FLAG-RTL8c was co-expressed  
24 in HEK293 cells with empty vector or with HA-PEG10 gag-pol, followed by analysis of the VLP fraction  
25 in ultracentrifuged media by western blot. FLAG-RTL8c was only found in the VLP fraction when HA-  
26 PEG10 was co-expressed (Fig. 5b), indicating that RTL8 is unable to independently form VLPs but can  
27 incorporate into VLPs produced by PEG10. To determine an approximate ratio of PEG10:RTL8  
28 abundance in ultracentrifuged VLPs, we expressed HA-tagged PEG10 along with an HA-tagged RTL8c  
29 to compare the abundance of HA tags as a proxy for PEG10:RTL8 stoichiometry. The ratio of HA-  
30 RTL8c:HA-PEG10 is decreased in the VLP fraction relative to cell lysate, and HA-RTL8c exists at  
31 approximately 5% the abundance of HA-PEG10 in the VLP fraction (Extended Data Fig. 6), together  
32 indicating either that RTL8 incorporation into PEG10-derived VLPs is inefficient, or that only low levels  
33 of RTL8 incorporation are tolerated before VLP formation or release is impossible. Consistent with the  
34 latter possibility, co-expression of FLAG-RTL8c also decreased the overall abundance of HA-PEG10  
35 VLPs in conditioned media (Fig. 5c,d, Extended Data Fig. 7). The inhibitory effect was more pronounced  
36 against forms of PEG10 lacking a functional pol region: gag alone, or a protease dead mutant (gag-

1 pol<sup>ASG</sup>), had a larger magnitude of change when co-expressed with FLAG-RTL8c despite higher baseline  
2 abundance of VLPs (Fig. 5d, Extended Data Fig. 8).

3  
4 If RTL8 inhibits VLP assembly or release from cells, co-expression of PEG10 with RTL8 should lead to  
5 accumulation of intracellular PEG10 due to the decreased export of PEG10 in VLPs. We examined  
6 retention of intracellular PEG10 with a flow cytometry-based fluorescent reporter of PEG10 abundance  
7 (Fig. 5e, Extended Data Fig. 9a). As proof of principle, we overexpressed PEG10-Dendra2 in HEK293<sup>WT</sup>  
8 and HEK293<sup>TKO</sup> cells and saw an increase in fluorescence in cells lacking *UBQLN1*, *2*, and *4* (Extended  
9 Data Fig. 9b). Co-expression of the PEG10 reporter construct with FLAG-RTL8c also led to increased  
10 intracellular fluorescence (Fig. 5f), consistent with intracellular accumulation of PEG10 due to RTL8  
11 restriction and furthering the hypothesis that RTL8 inhibits either PEG10 VLP assembly or release.

12  
13 Three paralogs of *RTL8* (*RTL8a*, *b*, and *c*) are all found on the X-chromosome and share >92% identity  
14 (Extended Data Fig. 9c)<sup>25</sup>. We tested all three *RTL8* paralogs, without and with their 3' UTRs, for the  
15 ability to induce retention of intracellular PEG10-Dendra2 and saw no differences in the intracellular  
16 retention of PEG10 (Extended Data Fig. 9d). Mice also express three *RTL8* paralogs from the X-  
17 chromosome which share comparatively less identity (Extended Data Fig. 9c). Expression of mouse  
18 FLAG-RTL8b, which shares the highest homology to human RTL8, had no effect on the intracellular  
19 retention of human PEG10-Dendra2 by flow cytometry (Fig. 5g), highlighting the species specificity of  
20 the PEG10:RTL8 relationship.

21  
22 *RTL8 is a competitive inhibitor of PEG10 VLPs*

23 Given that RTL8 closely resembles and interacts with PEG10 capsid<sup>NTD-lobe</sup>, we speculated that RTL8  
24 restricts VLP abundance by interfering with essential PEG10 NTD:NTD interactions necessary for proper  
25 VLP formation. By binding to the capsid<sup>NTD-lobe</sup> of PEG10, RTL8 competes with other PEG10 monomers  
26 for capsid<sup>NTD-lobe</sup> self-association, thereby interfering with the proper assembly of VLPs. In this model of  
27 interference, co-transfection of a truncated PEG10 capsid<sup>NTD-lobe</sup> with full-length PEG10 should similarly  
28 restrict VLP abundance. PEG10-Dendra2 was co-expressed with an unlabeled capsid<sup>NTD-lobe</sup> fragment,  
29 resulting in similar levels of intracellular PEG10-Dendra2 retention as compared to RTL8 co-expression  
30 (Fig. 5f). These data support the model that RTL8 antagonizes VLP release through its interactions with  
31 capsid<sup>NTD</sup> and suggest that RTL8 specifically acts as a competitive inhibitor of PEG10 capsid assembly.

32  
33 **Discussion**

34 Based on the data presented here, we propose a complex regulatory model of PEG10 VLP formation  
35 and release from human cells (Fig. 6). *PEG10* is tightly regulated at the transcriptional level, both in  
36 healthy and diseased tissues<sup>37</sup>. Once translated, PEG10 gag-pol protein is degraded by UBQLN2, which



1 limits the availability of PEG10 monomers for VLP assembly. In parallel, RTL8 inhibits VLP formation or  
2 release through competitive incorporation via RTL8:capsid<sup>NTD-lobe</sup> interactions. Low levels of RTL8  
3 incorporation are compatible with PEG10-derived VLPs, as RTL8 was detectable in PEG10 VLP  
4 preparations despite an overall loss in VLP abundance. This relationship may explain the paradoxical  
5 gain and loss of PEG10 and RTL8 observed upon *UBQLN2* perturbation: accumulation of PEG10 upon  
6 loss of *UBQLN2* increases VLP abundance, which promotes maximal incorporation of RTL8 into VLPs  
7 and subsequent loss of RTL8 protein from cell lysate. Presumably, any higher levels of RTL8  
8 incorporation would prevent the formation or release of VLPs from the cell, resulting in further  
9 intracellular accumulation of PEG10.

10

11 An outstanding question raised by our results is where RTL8 acts in the capsid assembly and release  
12 process to restrict PEG10 VLP abundance. One possibility is that upon RTL8 incorporation into early  
13 capsid multimers, the absence of an RTL8 capsid<sup>CTD-lobe</sup> prohibits the formation of higher-order  
14 assemblies generated through both homotypic CTD:CTD and heterotypic NTD:CTD interactions that are  
15 necessary for retroelement capsid assembly<sup>38-41</sup>. A second possibility is that RTL8 incorporation disrupts  
16 proper localization of the PEG10 capsid or protein:protein interactions necessary for trafficking and  
17 release of VLPs. In support of this hypothesis, recent studies have shown RTL8 influencing the  
18 localization and function of *UBQLN2*<sup>31</sup>, and RTL8 could have a similar effect on PEG10. Detailed  
19 investigation of PEG10 capsid assembly and release is warranted to distinguish these possibilities.

20

21 The ability of *RTL8* to antagonize PEG10-derived VLPs may be particularly relevant when considering  
22 the utility of PEG10 in generating biocompatible mRNA delivery systems, such as SEND<sup>21</sup>. Generation  
23 of PEG10-derived VLPs for the purposes of nucleic acid delivery in human cells may be limited in cell  
24 lines expressing abundant *RTL8*. Further, RTL8 may contaminate PEG10-derived VLPs due to low levels  
25 of incorporation. Alternatively, production of human PEG10 VLPs in cell lines derived from other species  
26 of origin may not be similarly inhibited, given the inability of murine RTL8 to induce cellular retention of  
27 human PEG10.

28

29 The regulation of PEG10 by *UBQLN2* and *RTL8* highlights the theme of genetic conflict. During  
30 embryonic development, there is conflict between paternally expressed genes, which promote growth  
31 of the offspring even at the expense of the mother, and maternally expressed genes, which limit the  
32 activity of paternal genes to maintain maternal health<sup>42,43</sup>. *PEG10* is a paternally expressed gene which  
33 is essential for placental development, but is linked to cancer and neurological disease<sup>15-17,19,22</sup>. *UBQLN2*  
34 and *RTL8* are located on the X-chromosome and in mice, placental expression of genes on the X-  
35 chromosome occurs exclusively from the maternal allele<sup>44</sup>. Our results therefore raise the intriguing  
36 possibility that both *UBQLN2* and *RTL8* represent maternal restriction factors that limit unchecked

1 activity of PEG10 in reproduction, and perhaps in other tissues, as directed by the paternal allele. In this  
2 sense, the domestication of *PEG10* could be considered incomplete; PEG10 retains the ability to  
3 promote pathology in non-reproductive tissues, and specific restriction factors have evolved to limit its  
4 activity to the tissues and expression levels that render it essential for survival.

5

6 Due to the overwhelming danger of unchecked genomic integration, the eukaryotic genome is littered  
7 with restriction factors that regulate TEs<sup>1</sup>. Some of these restriction factors are themselves derived from  
8 TEs: recently, a domesticated human *env* gene was discovered to limit the infectious capacity of type  
9 D retroviruses<sup>9</sup>. A second subset of restriction factors are derived from retroelement *gag* genes and act  
10 as competitive inhibitors of capsid formation, release, or uncoating. The sheep *gag*-derived gene  
11 *enJS56A1* restricts infection by the enJSRV family of viruses by disrupting capsid assembly and  
12 release<sup>8,45</sup>. The mouse *Fv1* gene is a *gag*-like restriction factor that targets incoming murine  
13 leukemia virus (MuLV) particles by coating the endocytosed virus and preventing disassembly of the  
14 capsid<sup>46</sup>. In a mechanism that closely mimics the PEG10:RTL8 relationship, the Ty1 retrotransposon in  
15 yeast is tightly regulated by the presence of a cryptic start site within the *gag* open reading frame, which  
16 results in the production of a truncated capsid<sup>CTD</sup> fragment. The truncated fragment prevents homotypic  
17 CTD:CTD interactions of intact capsid through competitive incorporation, thereby limiting Ty1 re-  
18 integration<sup>47</sup>. In each system, the *gag*-like genes use an affinity for capsid to inhibit the formation,  
19 release, or uncoating of the infectious particle. *Gag*-like genes are ubiquitous in the human genome<sup>48</sup>,  
20 but no such *gag*-like restriction mechanisms for retroviruses or domesticated retrotransposons have  
21 been described in humans. Based on our data, we posit that *RTL8* can be included in this list of ‘*gag*  
22 decoys’ which act at the step of TE capsid formation or release.

23

24 The ability of *RTL8* to antagonize *PEG10* raises the possibility that *RTL8* is a yet-uncharacterized  
25 susceptibility locus in neurological diseases. Population analyses and *in vitro* screens have failed to link  
26 *RTL8* mutation to human disease. However, *RTL8* is under positive selection<sup>25</sup>, implying the existence  
27 of an undiscovered adaptive function. These failures are likely due, at least in part, to the existence of  
28 three highly similar and potentially redundant *RTL8* genes, and due to their presence on the X-  
29 chromosome, which is excluded from typical GWAS studies. *RTL8* interacts with *UBQLN2* and  
30 contributes to protein quality control (PQC)<sup>31</sup>, and defects in PQC pathways are a hallmark of  
31 neurodegeneration<sup>49-51</sup>. In this context, *RTL8* loss or mutation may mimic *UBQLN2*-mediated disease<sup>52</sup>,  
32 as loss-of-function mutations in *RTL8* would result in elevated PEG10 VLP release. Due to the myriad  
33 roles of PEG10 in development, diverse disease, and applications of targeted mRNA delivery, further  
34 study of *RTL8* and its ability to inhibit PEG10 activity may provide valuable insight to advance both  
35 medicine and biotechnology.

36

## 1 **Materials and Methods**

| Target                   | Clonality           | Species | Vendor      | Catalog #  | Dilution | Application |
|--------------------------|---------------------|---------|-------------|------------|----------|-------------|
| UBQLN1/2                 | Monoclonal<br>M03   | Mouse   | Abnova      | H00029978  | 1:1000   | WB          |
| PEG10                    | Polyclonal          | Rabbit  | Proteintech | 14412-1-AP | 1:1000   | WB          |
| FAM127B (RTL8)           | Polyclonal          | Rabbit  | Proteintech | 20282-1-AP | 1:1000   | WB          |
| FLAG                     | Monoclonal<br>M2    | Mouse   | Sigma       | F3165      | 1:5000   | WB, IP      |
| FLAG                     | Monoclonal<br>D6W5B | Rabbit  | CST         | 14793      | 1:5000   | WB          |
| HA                       | Monoclonal<br>HA-7  | Mouse   | Sigma       | H3663      | 1:5000   | WB, IP      |
| HA                       | Monoclonal<br>C29F4 | Rabbit  | CST         | 3724       | 1:5000   | WB          |
| GAPDH                    | Monoclonal<br>14C10 | Rabbit  | CST         | 2118       | 1:5000   | WB          |
| Tubulin                  | Monoclonal<br>DM1A  | Mouse   | Novus       | NB100-690  | 1:10000  | WB          |
|                          |                     |         |             |            |          |             |
| $\alpha$ -mouse IgG 680  | Polyclonal          | Goat    | Licor       | 926-68070  | 1:20000  | WB          |
| $\alpha$ -mouse IgG 800  | Polyclonal          | Goat    | Licor       | 926-32210  | 1:20000  | WB          |
| $\alpha$ -rabbit IgG 680 | Polyclonal          | Goat    | Licor       | 926-68071  | 1:20000  | WB          |
| $\alpha$ -rabbit IgG 800 | Polyclonal          | Goat    | Licor       | 926-32211  | 1:20000  | WB          |

2

## 3 **Constructs**

| Construct Name | Insert          | Tag       | Species     | NCBI protein reference | Vector   |
|----------------|-----------------|-----------|-------------|------------------------|----------|
| gag-pol        | PEG10 (AA1-708) | 2x HA (N- | <i>Homo</i> | NP_055883.2            | pcDNA3.1 |

|                                |                                      |                      |                     |                |          |
|--------------------------------|--------------------------------------|----------------------|---------------------|----------------|----------|
|                                |                                      | terminal)            | <i>sapiens</i>      |                |          |
| gag-pol <sup>ASG</sup>         | PEG10 (AA1-708)*<br>D370A            | 2x HA (N-terminal)   | <i>Homo sapiens</i> | NP_055883.2    | pcDNA3.1 |
| gag                            | PEG10 (AA1-325)                      | 2x HA (N-terminal)   | <i>Homo sapiens</i> | NP_001035242.1 | pcDNA3.1 |
| capsid <sup>NTD-lobe</sup>     | PEG10 (AA1-160)                      | 2x HA (N-terminal)   | <i>Homo sapiens</i> |                | pcDNA3.1 |
| capsid <sup>CTD-lobe</sup>     | PEG10 (AA161-259)                    | 1x HA (C-terminal)   | <i>Homo sapiens</i> |                | pcDNA3.1 |
| capsid <sup>NTD-fragment</sup> | PEG10(AA1-111)                       | 2x HA (N-terminal)   | <i>Homo sapiens</i> |                | pcDNA3.1 |
| capsid <sup>CTD-fragment</sup> | PEG10 (AA112-259)                    | 2x HA (C-terminal)   | <i>Homo sapiens</i> |                | pcDNA3.1 |
| FLAG- <i>HsRTL8a</i>           | RTL8a (AA1-113)                      | 3x FLAG (N-terminal) | <i>Homo sapiens</i> | NP_001071640.1 | pcDNA3.1 |
| FLAG- <i>HsRTL8b</i>           | RTL8b (AA1-113)                      | 3x FLAG (N-terminal) | <i>Homo sapiens</i> | NP_001071641.1 | pcDNA3.1 |
| FLAG- <i>HsRTL8c</i>           | RTL8c (AA1-113)                      | 3x FLAG (N-terminal) | <i>Homo sapiens</i> | NP_001071639.1 | pcDNA3.1 |
| FLAG- <i>HsRTL8a</i> -3'UTR    | RTL8a (AA1-113),<br>with 700bp 3'UTR | 3x FLAG (N-terminal) | <i>Homo sapiens</i> | NP_001071640.1 | pcDNA3.1 |
| FLAG- <i>HsRTL8b</i> -3'UTR    | RTL8b (AA1-113),<br>with 859bp 3'UTR | 3x FLAG (N-terminal) | <i>Homo sapiens</i> | NP_001071641.1 | pcDNA3.1 |
| FLAG- <i>HsRTL8c</i> -3'UTR    | RTL8c (AA1-113),<br>with 821bp 3'UTR | 3x FLAG (N-terminal) | <i>Homo sapiens</i> | NP_001071639.1 | pcDNA3.1 |
| HA- <i>HsRTL8c</i>             | RTL8c (AA1-113)                      | 2x HA (N-terminal)   | <i>Homo sapiens</i> | NP_001071639.1 | pcDNA3.1 |
| HA- <i>HsRTL8c</i> -3'UTR      | RTL8c (AA1-113),<br>with 821bp 3'UTR | 2x HA (N-terminal)   | <i>Homo sapiens</i> | NP_001071639.1 | pcDNA3.1 |

|                       |                 |                                |                     |                |          |
|-----------------------|-----------------|--------------------------------|---------------------|----------------|----------|
| <i>Mm</i> RTL8b       | RTL8b (AA1-113) | 3x FLAG (N-terminal)           | <i>Mus musculus</i> | NP_001018073.1 | pcDNA3.1 |
| gag-pol flow reporter | PEG10 (AA1-708) | Dendra2 (C-terminal), IRES-CFP | <i>Homo sapiens</i> | NP_055883.2    | pDendra2 |

1

## 2 Cloning

3 All cloning was performed by Gibson assembly (Gibson HiFi master mix, Invitrogen) and transformed  
4 into chemically competent DH5 $\alpha$  *E. coli* cells (Invitrogen). Transformed *E. coli* were plated on either 50  
5 mg/mL kanamycin (Teknova) or 100 mg/mL carbenicillin (Gold Biotechnology) LB agar (Teknova) plates  
6 overnight at 37°C. Single colonies were picked and grown overnight in 5 mL LB Broth (Alfa Aesar) with  
7 kanamycin or carbenicillin at 37°C with shaking at 220 rpm. Shaking cultures were mini-prepped (Zymo)  
8 and sent for Sanger Sequencing (Azenta). Sequence verified samples were then grown in 50 mL LB  
9 Broth overnight with appropriate antibiotic at 37°C with shaking at 220 rpm. 50 mL cultures were midi-  
10 prepped (Zymo) for transfection.

11

## 12 Cell lines

13 hTR-8/SVneo cells were purchased from ATCC (CRL-3271). A549 and U-87 MG cells were a gift from  
14 Dr. Roy Parker (Department of Biochemistry, CU Boulder). HepG2 cells were obtained from ATCC (HB-  
15 8065) via the CU Boulder Biochemistry Shared Cell Culture Facility. HEK293 WT and *UBQLN1, 2, 4*  
16 knockout (TKO) cells were a gift from Dr. Ramanujan Hegde (Medical Research Council Laboratory of  
17 Molecular Biology, Cambridge England) and are described in Itakura et al.<sup>32</sup>

18

19 Induced cortical neurons were differentiated and cultured as previously described<sup>53</sup>. Cells were cultured  
20 on Matrigel (Corning) coated plates. Following differentiation, cells were maintained with half-media  
21 changes as described. The removed media from these half-media changes was collected, flash frozen,  
22 and stored at -80°C. Once ~20mL media had been collected, samples were thawed and virus-like  
23 particles isolated as described below.

24

25 All cells were maintained at 37°C with 5% CO<sub>2</sub>. HEK293 and A549 cells were maintained in DMEM  
26 (Invitrogen) supplemented with 1% penicillin/streptomycin (Invitrogen), 1% L-glutamine (R&D 2  
27 Systems, Inc.), and 10% FBS (Millipore Sigma). hTR-8/SVneo cells were maintained in RPMI  
28 1640 (Invitrogen) supplemented with penicillin/streptomycin, L-glutamine, and 10% FBS. HepG2 and  
29 U87 MG cells were maintained in MEM (Invitrogen) supplemented with penicillin/streptomycin, L-  
30 glutamine, and 10% FBS.

1

## 2 Transfection

3 Cells were grown to 70% confluency and transfected with Lipofectamine 2000 (ThermoFisher)  
4 according to manufacturer's instructions. For 6-well plates, 2.5µg plasmid DNA was transfected per  
5 well. For 12-well plates, 1µg plasmid DNA was transfected per well. For 96-well plates, 0.1µg plasmid  
6 DNA was transfected per well. For cotransfections, equal mass amounts of each plasmid were added  
7 to the total amount listed above. Transfection mixture was prepared at a ratio of 1µg DNA:2.5µL  
8 Lipofectamine 2000. Unless otherwise stated, cells and media were harvested 48h following  
9 transfection.

10

## 11 Generation of stable cell lines

12 MISSION lentiviral packaging plasmids and shRNA plasmids were purchased from Sigma-Aldrich.  
13 Generation of Lentiviral delivery vectors was performed according to manufacturer's recommendation.  
14 Briefly,  $\sim 1.7 \times 10^6$  HEK293T cells were plated on 10cm dishes. The following day, cells were transfected  
15 with three plasmids containing VSV-G, Δ8.9 packaging plasmid, and the target shRNA using  
16 Lipofectamine 2000 (Invitrogen). The following day, virus-containing media was collected, filtered  
17 through a 0.45µm filter, and stored at -80°C until infection.

18

19 Target cells were plated in 6-well plates for lentiviral infection. 24 hr after plating (at 30-50% confluency)  
20 cells were infected with virus-containing media. Polybrene (EMD Millipore) was added to virus-  
21 containing media to a final concentration of 8µg/mL. 1mL of this infection media was added per well,  
22 and the plate centrifuged at 1800RPM in an Allegra X-12R tabletop centrifuge for 45 min at room  
23 temperature. The cells were incubated at 37°C for 3 hr, then 2mL additional growth media added and  
24 the cells incubated at 37°C overnight. The following day, this spinfection was repeated exactly. Two  
25 days after the second infection, selection for infected cells was initiated through the introduction of  
26 2mg/mL (hTR-8/SVneo) or 8mg/mL (HepG2) puromycin (Gibco). Once stably infected, cells were  
27 maintained in growth media supplemented with puromycin.

28

## 29 Virus-like particle isolation

30 Virus-like particles were harvested from cultured media as previously described<sup>22</sup>. Briefly, T75 flasks  
31 were plated at 70% confluency (for endogenous VLP production), or 6-well plates (for overexpression  
32 experiments) were transfected as described above. Cells were grown for 48 hr and conditioned media  
33 was collected. Media was first centrifuged at 4700 x g for 10 min to remove cellular debris. The  
34 extracellular fraction was collected by ultracentrifugation using a preparative ultracentrifuge (Beckman  
35 Coulter) at 134,000 x g (Beckman SW41Ti rotor) for 4 hr at 4°C over a 30% sucrose (MP Biomedicals)

1 cushion. Media and sucrose were aspirated and the VLP-containing pellet was resuspended in western  
2 blot lysis buffer.

3

#### 4 Western blotting

5 Cells were harvested by trypsinization, pelleted, and washed in PBS. Cell pellets were resuspended in  
6 in 8M urea (Fisher Chemical) containing 75 mM NaCl (Honeywell), 50 mM HEPES (Millipore Sigma) pH  
7 8.5, with 1x cOmplete Mini EDTA-free protease inhibitor (Roche) and incubated at room temperature for  
8 15 min. Lysate was cleared by centrifugation at 21,300 x g and the supernatant collected for western  
9 blot. Total protein was quantified by BCA assay (Pierce).

10

11 For endogenous protein analysis, 15µg total protein was loaded into NuPage 4-12% Bis-Tris precast  
12 protein gels (Life Technologies) per sample. For overexpression experiments, 4µg total protein was  
13 loaded per sample. Protein concentrations for gel loading were normalized with excess urea lysis buffer  
14 along with 1x Laemmli sample buffer supplemented with βME (Sigma Aldrich). Proteins were separated  
15 by SDS-PAGE using 1x NuPage MES SDS running buffer (Life Technologies). For samples lysed in urea,  
16 wells of the protein gel were equilibrated in urea lysis buffer for 10 min, and urea washed out before  
17 loading protein samples.

18

19 Proteins were transferred to nitrocellulose membrane (Amersham) using the Invitrogen Mini Blot Module.  
20 Membranes were blocked with Intercept (PBS) blocking buffer (LICOR) for 30 min at room temperature.  
21 Membranes were incubated with primary antibody overnight at 4°C. Membranes were incubated with  
22 secondary antibodies for 30 min at room temperature. After both antibody incubations, membranes  
23 were washed three times for 5 min each in TBST. Membranes were imaged on a LICOR Odyssey CLx  
24 and analyzed with LICOR ImageStudio software.

25

26 Unless otherwise stated, western blots were analyzed as follows. For cell lysate, target protein signal  
27 was normalized to tubulin as a loading control. This ratio was then normalized to the mean of the ratio  
28 for all samples within the experiment to account for technical variability across replicates. For  
29 endogenous VLP production, target protein signal was normalized to the mean target signal for all  
30 samples within the experiment. For overexpression VLP production, the overexpressed target protein  
31 signal was normalized to the tubulin-normalized cell lysate abundance of that target to account for  
32 variability in transfection efficiency. This ratio was then normalized to the mean of the ratio for all samples  
33 within the experiment.

34

#### 35 Crosslinking Co-Immunoprecipitation

1 Cells were harvested by pipetting in ice cold PBS and centrifuged at 300 x g for 3 min, then resuspended  
2 in 300µL 0.1% PFA in PBS and incubated for 7 min at room temperature to crosslink proteins. Cells  
3 were collected by centrifugation at 300 x g for 3 min and washed three times with ice cold PBS.  
4 Crosslinked cells were lysed in 150µL lysis buffer containing 1% Triton X-100 (Sigma), 100mM NaCl  
5 (Honeywell), 10mM Hepes pH 7.5 (Sigma), 10mM EGTA (Sigma), 10mM EDTA (Sigma), and 1x protease  
6 inhibitor (Roche), and incubated for 30 min on ice. Lysate was pre-cleared by centrifugation at 16,000 x  
7 g for 5 min at 4°C and the supernatant was collected for immunoprecipitation.

8

9 Unless otherwise stated, all incubations and washes were performed with end-over-end rotation at room  
10 temperature. All centrifugation to collect beads was performed 2,500 x g for 2 min. Primary antibodies  
11 (5µg) or isotype controls (5µL) were incubated with 40µL protein A (Invitrogen) or protein G (Pierce) bead  
12 slurry for 30 min to couple antibodies to beads. After coupling, beads were collected by centrifugation  
13 and the supernatant discarded. Beads were washed twice (1mL 0.2M sodium borate, pH 9 for 1 min).  
14 Beads were resuspended in 400µL 20mM dimethyl pimelimidate (DMP, Thermo) and incubated for  
15 exactly 30 min to crosslink antibodies. After crosslinking, beads were washed twice (1mL 0.2M  
16 ethanolamine (EMD Millipore) pH 8 for 5 min) and incubated in 1.4mL 0.2M ethanolamine for two hr.  
17 Beads were then washed twice (1mL PBS for 5 min).

18

19 50µL crosslinked cell lysate and 50µL Triton lysis buffer were added to antibody-conjugated beads and  
20 incubated overnight at 4°C with end-over-end rotation. After incubation, beads were collected by  
21 centrifugation and washed three times (500µL PBS, 0.1% Triton X-100 for 2 min). To elute proteins,  
22 beads were resuspended in elution buffer (20µL 5x Laemmli sample buffer and 30µL PBS) and incubated  
23 at 90°C for 10 min. Following elution, the samples were centrifuged to collect the beads and the  
24 supernatant removed for analysis by western blot as described above. For SDS-PAGE, 7.5µL protein  
25 lysate (5%) and 25µL (50%) immunoprecipitated sample were loaded.

26

### 27 Sequence alignment

28 Sequence alignment was performed on the EMBL-EBI MUSCLE online interface<sup>54</sup>. Alignments used the  
29 ClustalW algorithm using the default parameters.

30

### 31 Structure prediction

32 Structures of *Homo sapiens* PEG10 gag (AA 1-325) and RTL8 (AA 1-113) were modeled using the Phyre  
33 2.0 web server<sup>55</sup> using the intensive modeling mode. Structures were visualized using UCSF Chimera<sup>56</sup>.

34

### 35 Flow cytometry



1 HEK293 cells were transfected in a 96-well plate with plasmids encoding a PEG10-Dendra2 fusion  
2 protein followed by an IRES-CFP cassette under control of a CMV promoter. Cells were lifted by  
3 pipetting in FACS buffer (D-PBS, 2% FBS, 0.1% sodium azide) and analyzed on a FACSCelesta (BD  
4 Biosciences). 20,000 events were collected per sample on the cytometer. Flow cytometry analysis was  
5 performed using Flowjo software (Treestar). Single cells were first gated on FSC-A vs SSC-A, followed  
6 by gating of CFP+ cells. PEG10-Dendra2 signal was normalized to an IRES-CFP expressed from the  
7 same plasmid to account for transfection differences by quantifying the geometric mean of Dendra2  
8 signal divided by the geometric mean of CFP signal for each sample.

9

#### 10 Statistics

11 Error bars represent mean  $\pm$  SEM for all Figures. All statistical analysis was performed using GraphPad  
12 Prism software. Standard one-way ANOVA was corrected for multiple comparisons by Dunnett's test  
13 as recommended. Standard two-way ANOVA was corrected for multiple comparisons by Šídák's test  
14 as recommended. For all figures, statistical tests are listed in the figure legend and \* $p < 0.05$ , \*\* $p < 0.01$ ,  
15 \*\*\* $p < 0.001$ , and \*\*\*\* $p < 0.0001$ .

16

1 **Author contributions:**

- 2 WC, HB, and AMW conceived of the project and designed the experiments. WC, HB, and CL  
3 executed the experiments. WC analyzed the data, in discussion with AMW. WC and AMW wrote the  
4 manuscript with input from all authors.

## 1 References

- 2 1. Goodier, J. L. Restricting retrotransposons: a review. *Mob. DNA* **7**, 16 (2016).
- 3 2. Brown, K. D. & Robertson, K. D. DNMT1 knockout delivers a strong blow to genome stability and  
4 cell viability. *Nat. Genet.* **39**, 289–290 (2007).
- 5 3. Zamudio, N. *et al.* DNA methylation restrains transposons from adopting a chromatin signature  
6 permissive for meiotic recombination. *Genes Dev.* **29**, 1256–1270 (2015).
- 7 4. Bourque, G. *et al.* Ten things you should know about transposable elements. *Genome Biol.* **19**,  
8 199 (2018).
- 9 5. Senft, A. D. & Macfarlan, T. S. Transposable elements shape the evolution of mammalian  
10 development. *Nat. Rev. Genet.* **22**, 691–711 (2021).
- 11 6. Lee, S.-H. *et al.* The SET domain protein Metnase mediates foreign DNA integration and links  
12 integration to nonhomologous end-joining repair. *Proc. Natl. Acad. Sci.* **102**, 18075–18080 (2005).
- 13 7. Nakamura, T. M. & Cech, T. R. Reversing Time: Origin of Telomerase. *Cell* **92**, 587–590 (1998).
- 14 8. Murcia, P. R., Arnaud, F. & Palmarini, M. The Transdominant Endogenous Retrovirus enJS56A1  
15 Associates with and Blocks Intracellular Trafficking of Jaagsiekte Sheep Retrovirus Gag. *J. Virol.*  
16 **81**, 1762–1772 (2007).
- 17 9. Frank, J. A. *et al.* Evolution and antiviral activity of a human protein of retroviral origin. *Science*  
18 **378**, 422–428 (2022).
- 19 10. Srinivasachar Badarinarayan, S. & Sauter, D. Switching Sides: How Endogenous Retroviruses  
20 Protect Us from Viral Infections. *J. Virol.* **95**, e02299-20.
- 21 11. Antony, J. M. *et al.* The Human Endogenous Retrovirus Envelope Glycoprotein, Syncytin-1,  
22 Regulates Neuroinflammation and Its Receptor Expression in Multiple Sclerosis: A Role for  
23 Endoplasmic Reticulum Chaperones in Astrocytes. *J. Immunol.* **179**, 1210–1224 (2007).
- 24 12. Sankowski, R. *et al.* Endogenous retroviruses are associated with hippocampus-based memory  
25 impairment. *Proc. Natl. Acad. Sci.* **116**, 25982–25990 (2019).
- 26 13. Shiura, H. *et al.* PEG10 viral aspartic protease domain is essential for the maintenance of fetal  
27 capillary structure in the mouse placenta. *Development* **148**, dev199564 (2021).

- 1 14. Ono, R. *et al.* Deletion of Peg10, an imprinted gene acquired from a retrotransposon, causes early  
2 embryonic lethality. *Nat. Genet.* **38**, 101–106 (2006).
- 3 15. Akamatsu, S. *et al.* The Placental Gene PEG10 Promotes Progression of Neuroendocrine Prostate  
4 Cancer. *Cell Rep.* **12**, 922–936 (2015).
- 5 16. Deng, X. *et al.* PEG10 plays a crucial role in human lung cancer proliferation, progression,  
6 prognosis and metastasis. *Oncol. Rep.* **32**, 2159–2167 (2014).
- 7 17. Li, X. *et al.* PEG10 promotes human breast cancer cell proliferation, migration and invasion. *Int. J.*  
8 *Oncol.* **48**, 1933–1942 (2016).
- 9 18. Whiteley, A. M. *et al.* Global proteomics of Ubqln2-based murine models of ALS. *J. Biol. Chem.*  
10 **296**, 100153 (2021).
- 11 19. Pandya, N. J. *et al.* Secreted retrovirus-like GAG-domain-containing protein PEG10 is regulated by  
12 UBE3A and is involved in Angelman syndrome pathophysiology. *Cell Rep. Med.* **2**, 100360 (2021).
- 13 20. Abed, M. *et al.* The Gag protein PEG10 binds to RNA and regulates trophoblast stem cell lineage  
14 specification. *PLOS ONE* **14**, e0214110 (2019).
- 15 21. Segel, M. *et al.* Mammalian retrovirus-like protein PEG10 packages its own mRNA and can be  
16 pseudotyped for mRNA delivery. *Science* **373**, 882–889 (2021).
- 17 22. Black, H. H. *et al.* *UBQLN2 restrains the domesticated retrotransposon PEG10 to maintain*  
18 *neuronal health in ALS*. <http://biorxiv.org/lookup/doi/10.1101/2022.03.25.485837> (2022)  
19 doi:10.1101/2022.03.25.485837.
- 20 23. Ashley, J. *et al.* Retrovirus-like Gag Protein Arc1 Binds RNA and Traffics across Synaptic Boutons.  
21 *Cell* **172**, 262-274.e11 (2018).
- 22 24. Pastuzyn, E. D. *et al.* The Neuronal Gene Arc Encodes a Repurposed Retrotransposon Gag  
23 Protein that Mediates Intercellular RNA Transfer. *Cell* **172**, 275-288.e18 (2018).
- 24 25. Brandt, J., Veith, A. M. & Volff, J.-N. A family of neofunctionalized Ty3/gypsy retrotransposon  
25 genes in mammalian genomes. *Cytogenet. Genome Res.* **110**, 307–317 (2005).
- 26 26. Havecker, E. R., Gao, X. & Voytas, D. F. The diversity of LTR retrotransposons. *Genome Biol.*  
27 (2004).

- 1 27. Cordaux, R. & Batzer, M. A. The impact of retrotransposons on human genome evolution. *Nat.*  
2 *Rev. Genet.* **10**, 691–703 (2009).
- 3 28. Lux, A. *et al.* Human Retroviral *gag* - and *gag-pol* -like Proteins Interact with the Transforming  
4 Growth Factor- $\beta$  Receptor Activin Receptor-like Kinase 1. *J. Biol. Chem.* **280**, 8482–8493 (2005).
- 5 29. Clark, M. B. *et al.* Mammalian Gene *PEG10* Expresses Two Reading Frames by High Efficiency –1  
6 Frameshifting in Embryonic-associated Tissues. *J. Biol. Chem.* **282**, 37359–37369 (2007).
- 7 30. Steplewski, A. *et al.* MyEF-3, a Developmentally Controlled Brain-Derived Nuclear Protein Which  
8 Specifically Interacts with Myelin Basic Protein Proximal Regulatory Sequences. *Biochem.*  
9 *Biophys. Res. Commun.* **243**, 295–301 (1998).
- 10 31. Mohan, H. M. *et al.* RTL8 promotes nuclear localization of UBQLN2 to subnuclear compartments  
11 associated with protein quality control. *Cell. Mol. Life Sci.* **79**, 176 (2022).
- 12 32. Itakura, E. *et al.* Ubiquilins Chaperone and Triage Mitochondrial Membrane Proteins for  
13 Degradation. *Mol. Cell* **63**, 21–33 (2016).
- 14 33. *Structure and Physics of Viruses: An Integrated Textbook*. vol. 68 (Springer Netherlands, 2013).
- 15 34. Dodonova, S. O., Prinz, S., Bilanchone, V., Sandmeyer, S. & Briggs, J. A. G. Structure of the  
16 Ty3/Gypsy retrotransposon capsid and the evolution of retroviruses. *Proc. Natl. Acad. Sci.* **116**,  
17 10048–10057 (2019).
- 18 35. Li, S., Hill, C. P., Sundquist, W. I. & Finch, J. T. Image reconstructions of helical assemblies of the  
19 HIV-1 CA protein. *Nature* **407**, 409–413 (2000).
- 20 36. Zurowska, K., Alam, A., Ganser-Pornillos, B. K. & Pornillos, O. Structural evidence that MOAP1  
21 and PEG10 are derived from retrovirus/retrotransposon Gag proteins. *Proteins Struct. Funct.*  
22 *Bioinforma.* **90**, 309–313 (2022).
- 23 37. Xie, T. *et al.* PEG10 as an oncogene: expression regulatory mechanisms and role in tumor  
24 progression. *Cancer Cell Int.* **18**, 112 (2018).
- 25 38. Zhang, M., Larsen, L. S., Irwin, B., Bilanchone, V. & Sandmeyer, S. Two-hybrid analysis of Ty3  
26 capsid subdomain interactions. *Mob. DNA* **1**, (2010).

- 1 39. Lanman, J., Sexton, J., Sakalian, M. & Prevelige, P. E. Kinetic Analysis of the Role of Intersubunit  
2 Interactions in Human Immunodeficiency Virus Type 1 Capsid Protein Assembly In Vitro. *J. Virol.*  
3 **76**, 6900–6908 (2002).
- 4 40. Lanman, J. *et al.* Key interactions in HIV-1 maturation identified by hydrogen-deuterium exchange.  
5 *Nat. Struct. Mol. Biol.* **11**, 676–677 (2004).
- 6 41. Yufenyuy, E. L. & Aiken, C. The NTD-CTD intersubunit interface plays a critical role in assembly  
7 and stabilization of the HIV-1 capsid. *Retrovirology* **10**, 29 (2013).
- 8 42. Constância, M. *et al.* Placental-specific IGF-II is a major modulator of placental and fetal growth.  
9 *Nature* **417**, 945–948 (2002).
- 10 43. Moore, T. & Haig, D. Genomic imprinting in mammalian development: a parental tug-of-war.  
11 *Trends Genet.* **7**, 45–49 (1991).
- 12 44. Finn, E. H., Smith, C. L., Rodriguez, J., Sidow, A. & Baker, J. C. Maternal bias and escape from X  
13 chromosome imprinting in the midgestation mouse placenta. *Dev. Biol.* **390**, 80–92 (2014).
- 14 45. Armezzani, A., Varela, M., Spencer, T., Palmarini, M. & Arnaud, F. “Ménage à Trois”: The  
15 Evolutionary Interplay between JSRV, enJSRVs and Domestic Sheep. *Viruses* **6**, 4926–4945  
16 (2014).
- 17 46. Passerini, L. D., Keckesova, Z. & Towers, G. J. Retroviral Restriction Factors Fv1 and TRIM5a Act  
18 Independently and Can Compete for Incoming Virus before Reverse Transcription. *J VIROL* **80**,  
19 2100–2105 (2006).
- 20 47. Cottee, M. A. *et al.* Structure of a Ty1 restriction factor reveals the molecular basis of transposition  
21 copy number control. *Nat. Commun.* **12**, 5590 (2021).
- 22 48. Campillos, M., Doerks, T., Shah, P. & Bork, P. Computational characterization of multiple Gag-like  
23 human proteins. *Trends Genet.* **22**, 585–589 (2006).
- 24 49. Shahheydari, H. *et al.* Protein Quality Control and the Amyotrophic Lateral  
25 Sclerosis/Frontotemporal Dementia Continuum. *Front. Mol. Neurosci.* **10**, 119 (2017).
- 26 50. Ross, C. A. & Poirier, M. A. Protein aggregation and neurodegenerative disease. *Nat. Med.* **10**,  
27 S10–S17 (2004).

- 1 51. Ross, C. A. & Poirier, M. A. What is the role of protein aggregation in neurodegeneration? *Nat. Rev.*  
2 *Mol. Cell Biol.* **6**, 891–898 (2005).
- 3 52. Deng, H.-X. *et al.* Mutations in UBQLN2 cause dominant X-linked juvenile and adult-onset ALS  
4 and ALS/dementia. *Nature* **477**, 211–215 (2011).
- 5 53. Fernandopulle, M. S. *et al.* Transcription Factor-Mediated Differentiation of Human iPSCs into  
6 Neurons: Rapid differentiation of iPSCs into neurons. *Curr. Protoc. Cell Biol.* **79**, e51 (2018).
- 7 54. Madeira, F. *et al.* Search and sequence analysis tools services from EMBL-EBI in 2022. *Nucleic*  
8 *Acids Res.* **50**, W276–W279 (2022).
- 9 55. Kelley, L. A., Mezulis, S., Yates, C. M., Wass, M. N. & Sternberg, M. J. E. The Phyre2 web portal  
10 for protein modeling, prediction and analysis. *Nat. Protoc.* **10**, 845–858 (2015).
- 11 56. Pettersen, E. F. *et al.* UCSF Chimera--A visualization system for exploratory research and analysis.  
12 *J. Comput. Chem.* **25**, 1605–1612 (2004).
- 13

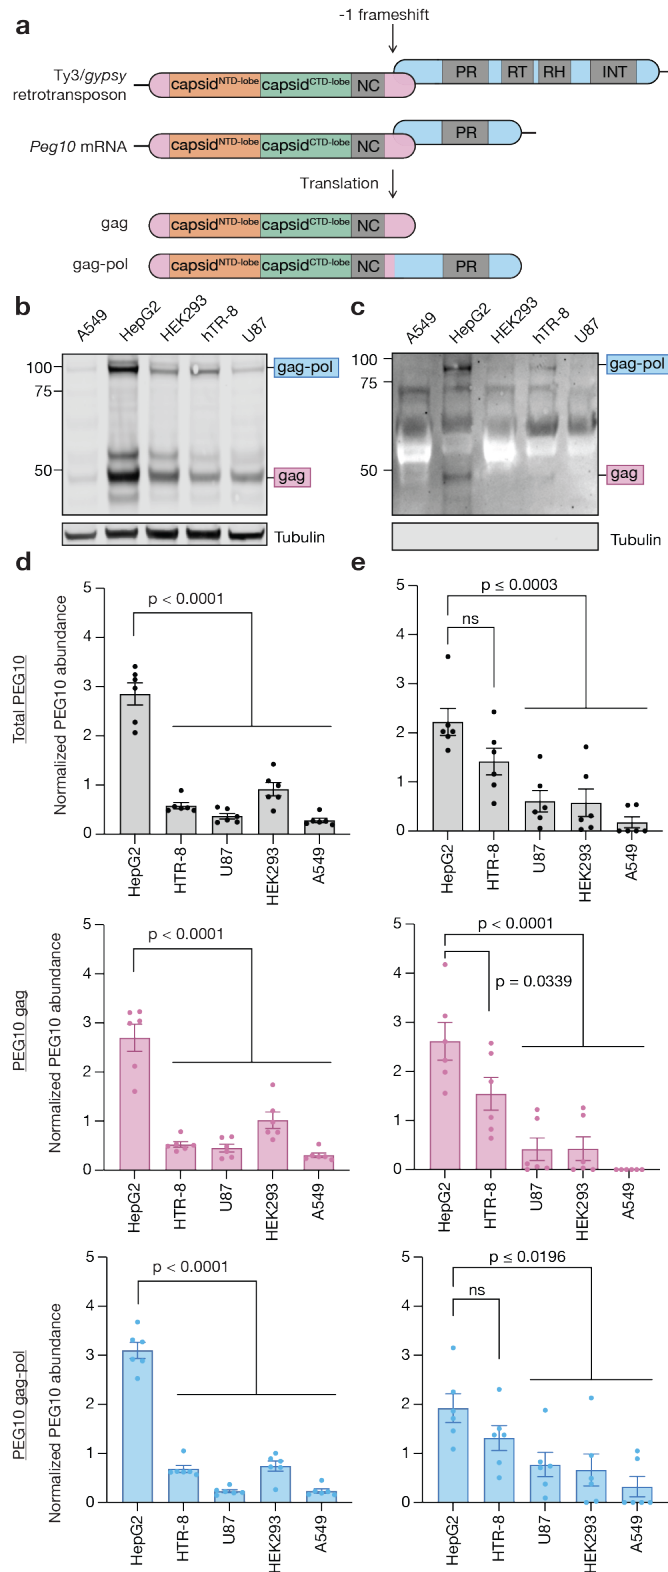

1

2 **Figure 1: PEG10-derived VLPs are released by human cells.** a) Schematic of the domesticated  
 3 retrotransposon *PEG10*, aligned to its ancestral Ty3 retrotransposon. Upon use of a programmed -1  
 4 ribosomal frameshift, *PEG10* translates two different protein products, gag and gag-pol polyprotein.  
 5 *PEG10* gag contains the structural capsid forming two distinct lobes, capsid<sup>NTD-lobe</sup> and capsid<sup>CTD-lobe</sup>,  
 6 and nucleic acid-binding nucleocapsid (NC). *PEG10* pol contains a retrovirus-like aspartic protease (PR).



1 **b)** Representative western blot showing PEG10 abundance in lysate from A549, HepG2, HEK293, hTR-  
2 8, and U87 cell lines. n = 6 representative experiments. **c)** Representative western blot showing PEG10  
3 VLP production across cell lines. n = 6 representative experiments. **d)** Quantification of PEG10  
4 abundance from Fig. 1b. (top) Total PEG10 was calculated as the sum of gag-pol and gag signal  
5 normalized to tubulin. gag (middle) and gag-pol (bottom) were analyzed as described in methods. n = 6  
6 representative experiments. Data were analyzed by ordinary one-way ANOVA with column means  
7 compared to the highest abundance cell line, HepG2. **e)** Quantification of PEG10 VLP signal in Fig. 1c.  
8 Data are analyzed as in 1d.

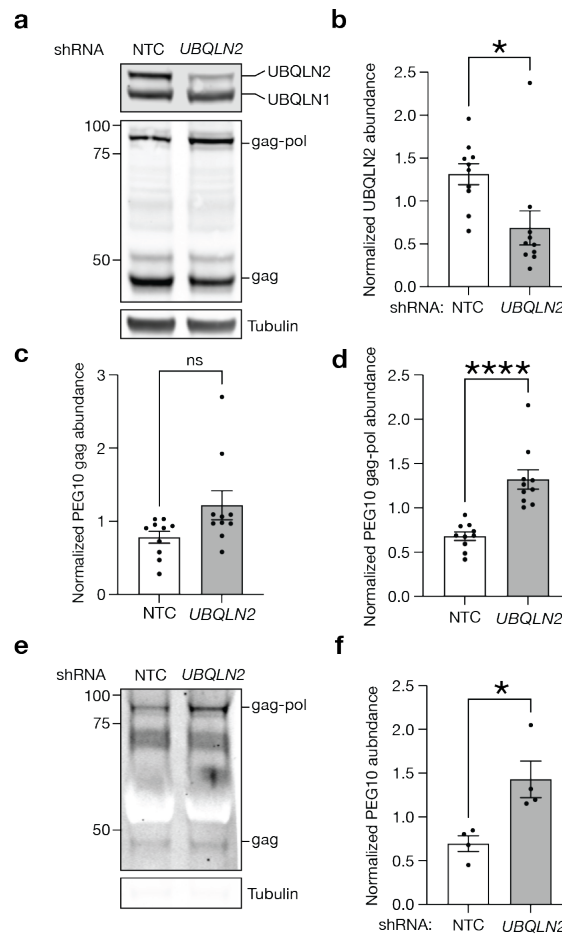

1

2 **Figure 2: UBQLN2 regulates PEG10 gag-pol to restrict VLP abundance. a)** Representative western  
3 blot showing PEG10 and UBQLN1/2 abundance in hTR-8 cells stably expressing non-targeting control  
4 (NTC) or *UBQLN2* knockdown (*UBQLN2*) shRNAs. **b)** Quantification of UBQLN2 abundance from Fig.  
5 2a. **c)** Quantification of PEG10 gag abundance from Fig. 2a. **d)** Quantification of PEG10 gag-pol  
6 abundance from Fig. 2a. **e)** Representative western blot showing increased PEG10 VLP signal in hTR-8  
7 *shUBQLN2* cells compared to non-targeting control. n = 5 representative experiments. **f)** Quantification  
8 and analysis of PEG10 abundance from Figure 2e. PEG10 VLP signal was measured as the sum of gag-  
9 pol and gag band intensities normalized as described in methods. For b-d and f, data were analyzed by  
10 Student's t-test (\* $p < 0.05$ , \*\*\*\*  $p < 0.0001$ ).

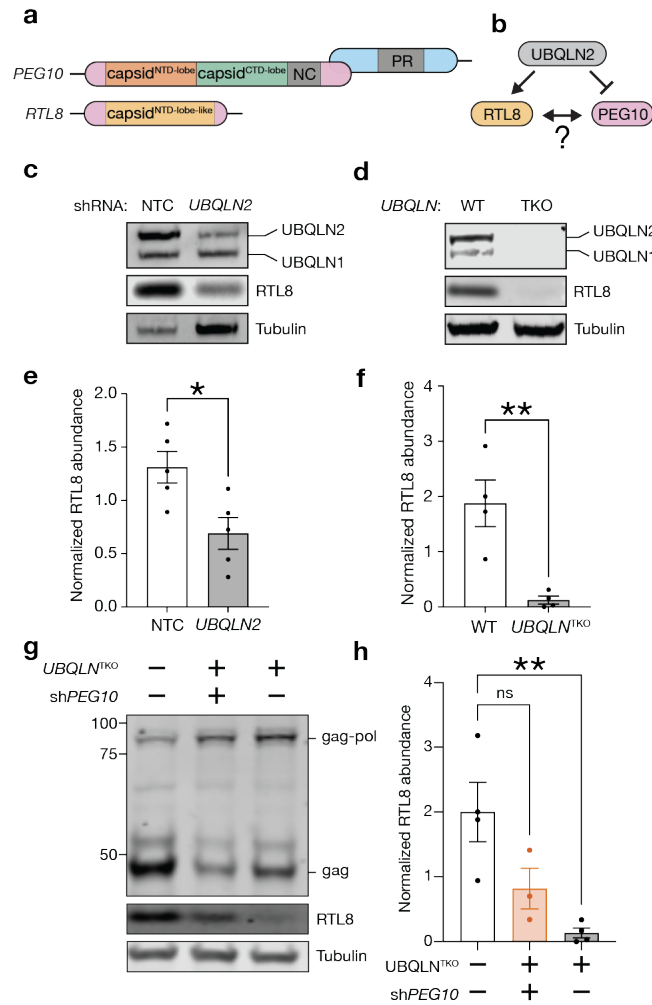

1

2 **Figure 3: UBQLN2 regulates RTL8 levels in a PEG10-dependent manner.** **a)** Cartoon schematic of  
3 PEG10 and RTL8 protein sequences. RTL8 shares high homology to PEG10 capsid<sup>NTD</sup>. **b)** Cartoon  
4 highlighting the relationship between UBQLN2, PEG10, and RTL8. Expression of *UBQLN2* decreases  
5 PEG10 abundance and increases RTL8 abundance despite no changes in transcription or translation.  
6 The relationship between PEG10 and RTL8 is unknown. **c)** Representative western blot measuring  
7 changes to RTL8 abundance in upon knockdown of *UBQLN2* in hTR-8 cells. **d)** Representative western  
8 blot measuring changes to RTL8 abundance in upon genetic loss of *UBQLN1*, 2, and 4 in HEK293<sup>TKO</sup>  
9 cells. **e)** Quantification of data in Fig. 3c. Data are analyzed by Student's t-test (\*p<0.05, \*\* p<0.01). **f)**  
10 Quantification and analysis of data in Fig. 3d. Data are analyzed as in Fig. 3e. **g)** Representative western  
11 blot showing RTL8 abundance upon loss of *UBQLN2* and rescue upon subsequent knockdown of  
12 *PEG10*. **h)** Quantification of data in Figure 3g. Data were analyzed by ordinary one-way ANOVA with  
13 column means compared to HEK293<sup>WT</sup> cells.

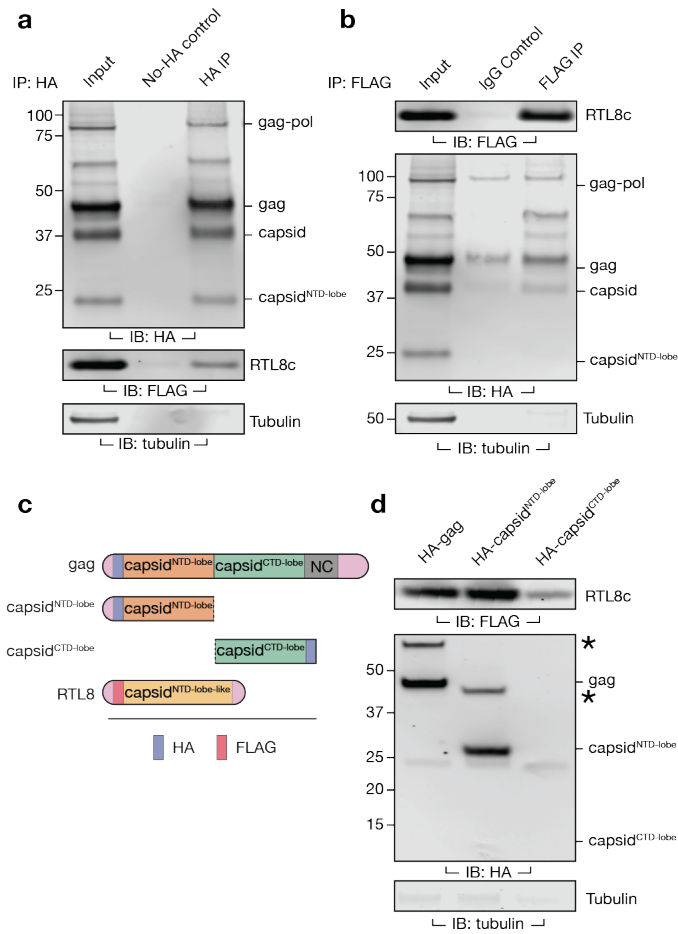

1

**Figure 4: RTL8 interacts with the capsid<sup>NTD-lobe</sup> of PEG10.** **a)** Crosslinking co-immunoprecipitation of  
 3 RTL8c with PEG10. HA-tagged PEG10 and FLAG-tagged RTL8c were co-expressed, proteins  
 4 crosslinked, cells lysed, and complexes immunoprecipitated using an HA antibody. No-HA control cells  
 5 were transfected only with FLAG-RTL8c before HA-immunoprecipitation. **b)** Crosslinking co-  
 6 immunoprecipitation of PEG10 with RTL8c. FLAG-tagged RTL8c and HA-tagged PEG10 were co-  
 7 expressed and prepared as in Fig. 4a. Complexes were immunoprecipitated using a FLAG antibody or  
 8 an IgG isotype control antibody. **c)** Diagram of PEG10 constructs including HA-capsid<sup>NTD-lobe</sup> and HA-  
 9 capsid<sup>CTD-lobe</sup> truncations tested for interaction with FLAG-RTL8c. N-terminal HA tag is shown in blue  
 10 and N-terminal FLAG tag is shown in red. **d)** Representative immunoprecipitations of FLAG-RTL8c  
 11 showing co-immunoprecipitation of HA-gag and HA-capsid<sup>NTD-lobe</sup>. Asterisk indicates an additional high  
 12 molecular weight product positive for both HA and FLAG. Due to low relative expression of HA-  
 13 capsid<sup>CTD-lobe</sup>, an additional experimental replicate was performed with an overabundance of HA-  
 14 capsid<sup>CTD-lobe</sup> lysate in Extended Data Fig. 5c.

15

16

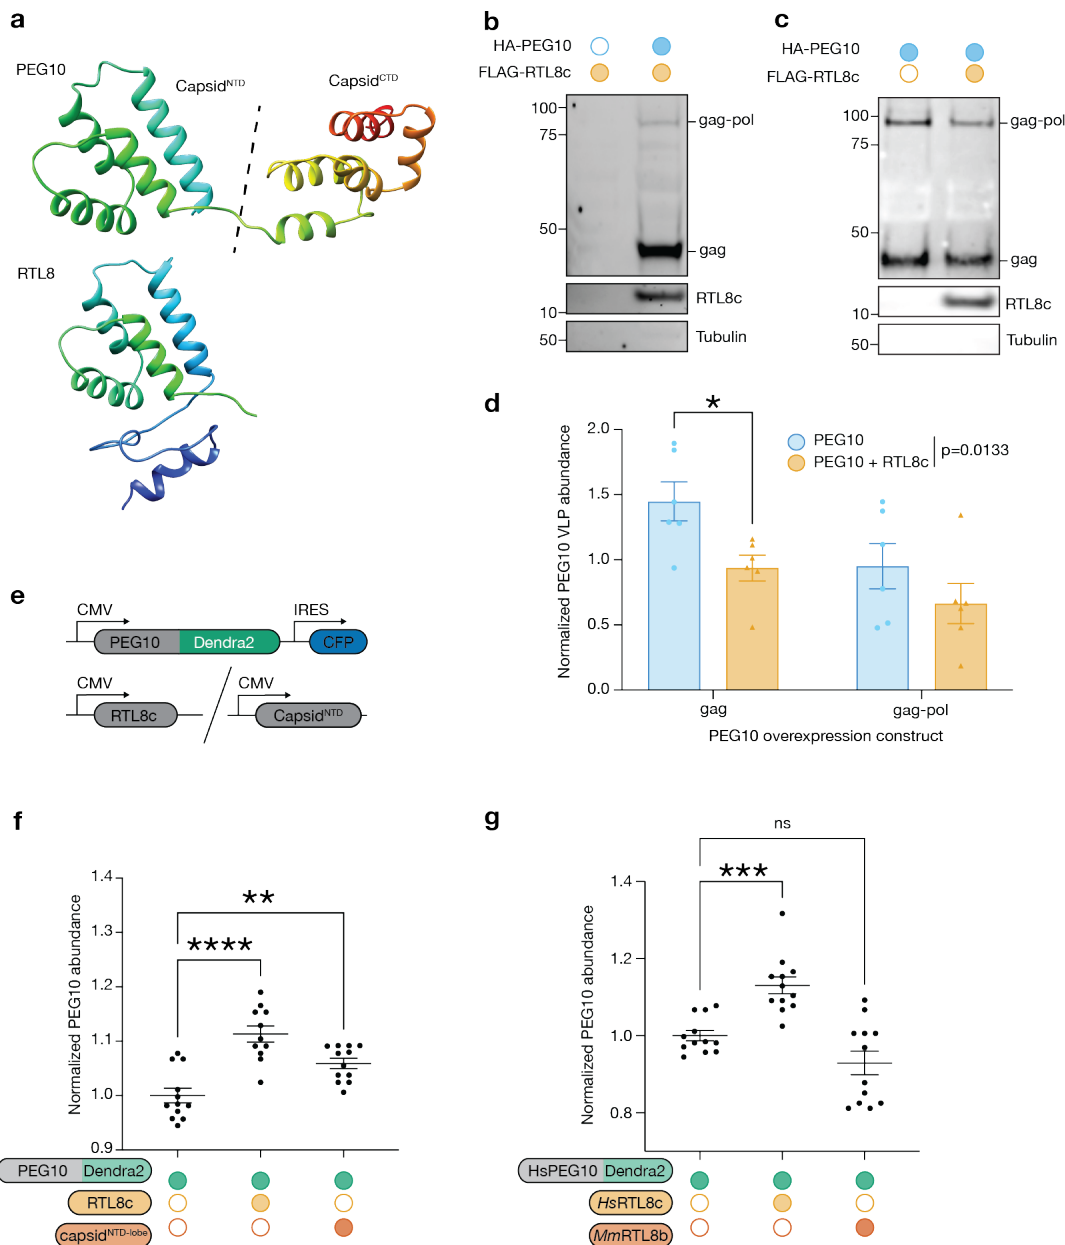

1  
 2 **Figure 5: RTL8 incorporates into PEG10 VLPs and decreases the efficiency of release. a)** (top)  
 3 Predicted structure of PEG10 capsid shows the clear separation of NTD and CTD lobes. (bottom) The  
 4 predicted structure of RTL8c, which bears striking similarity to capsid<sup>NTD-lobe</sup> of PEG10. **b)** Representative  
 5 western blot measuring FLAG-RTL8c presence in the VLP fraction. FLAG-RTL8c was co-expressed  
 6 without or with HA-PEG10. FLAG-RTL8c release in the VLP fraction is dependent upon co-expression  
 7 of HA-PEG10. **c)** Representative western blot showing HA-PEG10 VLP signal without and with FLAG-  
 8 RTL8c co-expression. **d)** Quantification of HA-PEG10 VLP signal with FLAG-RTL8c co-expression. For  
 9 PEG10 gag-pol overexpression, gag and gag-pol signal was summed to calculate total PEG10 VLP  
 10 signal. Data are analyzed by ordinary two-way ANOVA considering the effect of FLAG-RTL8c co-  
 11 expression and HA-PEG10 overexpression construct. **e)** Design schematic of a flow assay assessing  
 12 intracellular PEG10 signal. PEG10 is expressed as a fusion protein with the fluorescent protein Dendra2  
 13 at its C-terminus, followed by an IRES-CFP for transfection efficiency control. **f)** Flow cytometry

1 measurement of intracellular PEG10-Dendra2 abundance. PEG10-Dendra2 was co-expressed with  
2 either a control vector (pcDNA3.1), FLAG-RTL8c, or HA-capsid<sup>NTD-lobe</sup>, and PEG10-Dendra2 was  
3 measured to determine its intracellular abundance. Data were analyzed by ordinary one-way ANOVA.  
4 **g)** PEG10-Dendra2 was co-expressed with control, FLAG-*Hs*RTL8c, or FLAG-*Mm*RTL8b and  
5 intracellular abundance was measured by flow cytometry. Data were analyzed as in Fig. 5f.

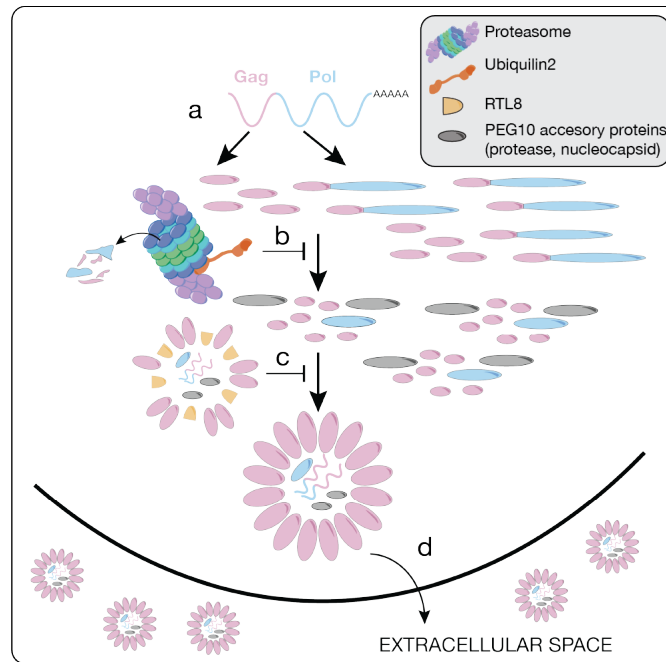

1

2 **Figure 6: Model of UBQLN2 and RTL8 antagonism of PEG10 VLP abundance.** a) PEG10 mRNA is  
3 translated to produce gag and gag-pol polyprotein. b) PEG10 gag-pol polyprotein is recognized by  
4 Ubiquitin2 to mediate proteasomal degradation, decreasing VLP release. c) RTL8 competitively inhibits  
5 formation or release of PEG10 VLPs. d) Despite overlapping restriction mechanisms, PEG10 VLPs are  
6 exported from some human cell lines. More work is required to understand the delicate balance between  
7 restriction release, as well as downstream effects of PEG10 VLPs.

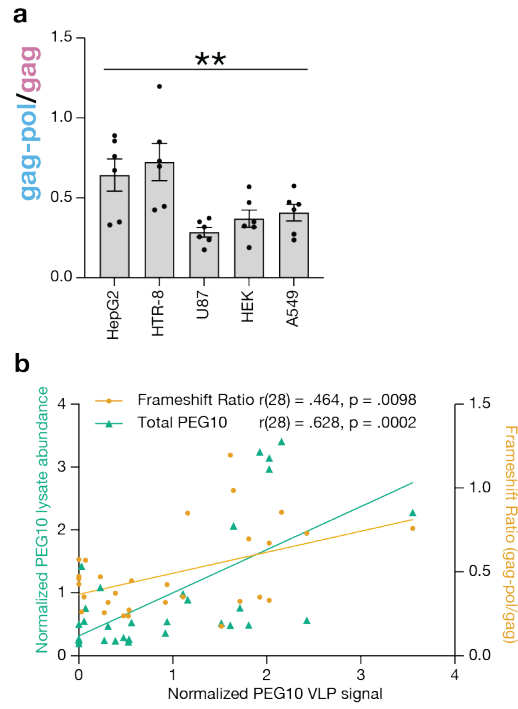

1

2 **Extended Data Fig. 1: Putative descriptors of VLP release in human cell lines. a)** Quantification of  
3 PEG10 frameshift ratio from Fig. 1b. Frameshift ratio is calculated as gag-pol signal over gag signal.  
4 Data are analyzed by ordinary one-way ANOVA. p-values are corrected for multiple comparisons by  
5 Dunnett's test. **b)** Pearson correlation between total PEG10 (left Y-axis) and frameshift ratio (right Y-  
6 axis) and PEG10 VLP signal.



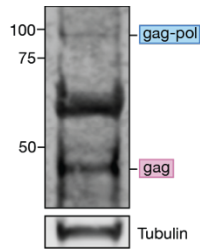

1

2 **Extended Data Fig. 2: PEG10 VLPs are produced by induced human neurons.** Neurons were  
3 differentiated and cultured as in Fernandopulle et al. 2018<sup>53</sup>. ~20mL cultured media was ultracentrifuged  
4 to generate the VLP fraction. Tubulin is observed in the VLP fraction, which may arise from Matrigel  
5 used during cell culture.

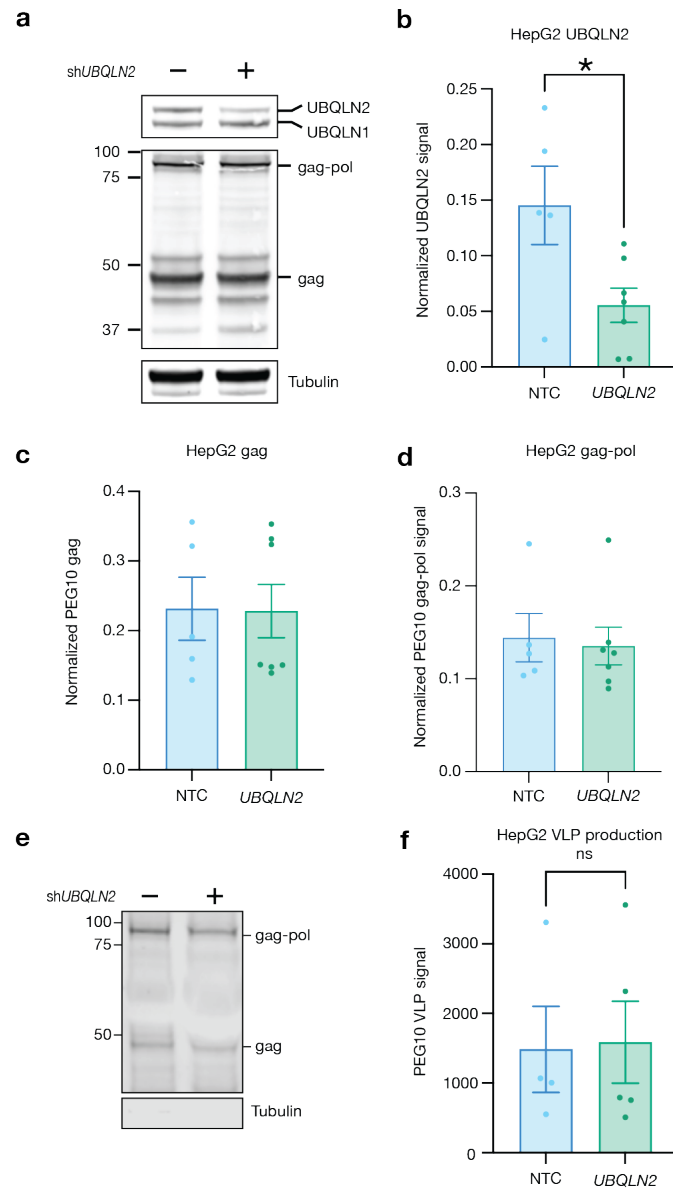

1  
 2 **Extended Data Fig. 3: VLP abundance in HepG2 cells with loss of *UBQLN2* expression. a)**  
 3 Representative western blot showing PEG10 and UBQLN1/2 abundance in HepG2 cells stably  
 4 expressing non-targeting control (NTC) or *UBQLN2* (*UBQLN2*) shRNA. **b)** Quantification of UBQLN2  
 5 abundance from Extended Data Fig. 3a. **c)** Quantification of PEG10 gag abundance from Extended Data  
 6 Fig. 3a. **d)** Quantification and analysis of PEG10 gag-pol abundance from Extended Data Fig. 3a. **e)**  
 7 Representative western blot showing no change to PEG10 VLP abundance in HepG2 sh*UBQLN2* cells  
 8 compared to non-targeting control. n = 5 representative experiments. **f)** Quantification and analysis of  
 9 PEG10 abundance from Extended Data Fig. 3e. PEG10 VLP abundance was calculated as in Fig. 2. All  
 10 data were analyzed as in Fig. 2

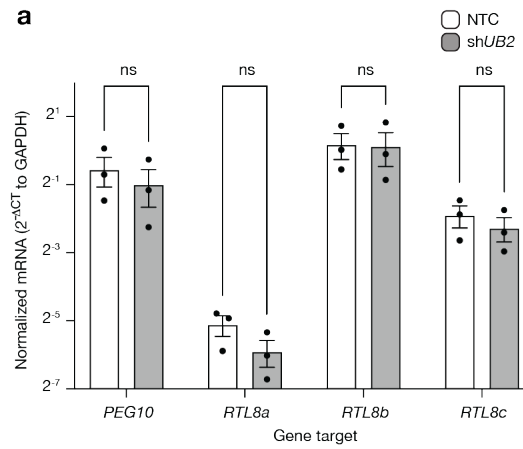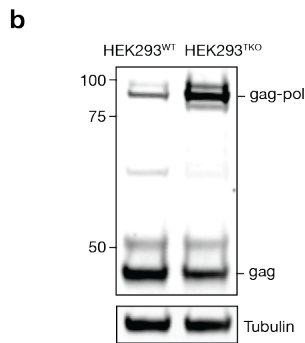

1

2 **Extended Data Fig. 4: Attenuation of *UBQLN* expression does not influence transcript levels of**  
3 ***PEG10* or *RTL8*.** **a)** qRT-PCR quantifying *PEG10*, *RTL8a*, *RTL8b*, and *RTL8c* expression in hTR-8 NTC  
4 and sh*UBQLN2* cells. n = 3 biological replicates with 3 technical replicates each. Data are analyzed by  
5 standard two-way ANOVA. **b)** Representative western blot showing PEG10 gag-pol accumulation in  
6 HEK293<sup>TKO</sup> cells.

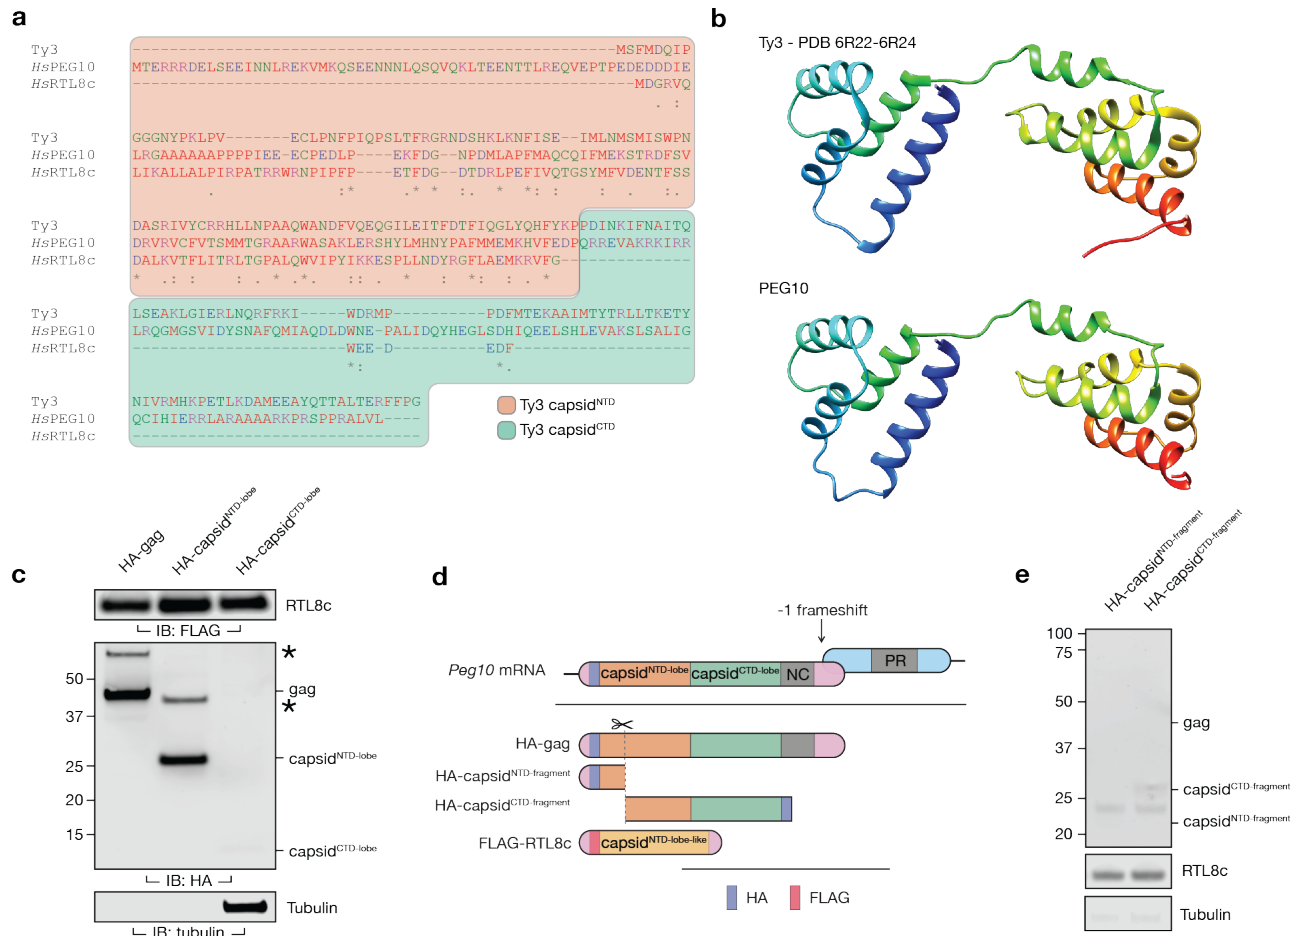

1  
2 **Extended Data Fig. 5: PEG10 closely resembles Ty3 and self-associates in a manner resembling**  
3 **the ancestral retrotransposon. a)** Sequence alignment of the Ty3 and PEG10 capsid domains, and  
4 full length RTL8c. The demarcation between Ty3 capsid<sup>NTD-lobe</sup> and capsid<sup>CTD-lobe</sup> is indicated with shaded  
5 color background. **b)** (top) Structure of the Ty3 capsid<sup>34</sup>. (bottom) Predicted structure of PEG10 gag. **c)**  
6 CoIP of FLAG-RTL8c with HA-PEG10 gag, capsid<sup>NTD-lobe</sup>, and capsid<sup>CTD-lobe</sup>, as in Fig. 4d. Five times the  
7 total input protein was loaded in the capsid<sup>CTD-lobe</sup> immunoprecipitation to detect weak interactions with  
8 FLAG-RTL8c that may have been below the detection threshold in Fig. 4d. Input concentrations were  
9 high enough that nonspecific interactions with tubulin were detected, but capsid<sup>CTD-lobe</sup> remained below  
10 the limit of detection. **d)** Diagram of additional PEG10 constructs including HA-capsid<sup>NTD-fragment</sup> and HA-  
11 capsid<sup>CTD-fragment</sup> truncations to approximate the endogenous cleavage event within the capsid. **d)** Co-  
12 immunoprecipitation of FLAG-RTL8c with capsid cleavage products HA-capsid<sup>NTD-fragment</sup> and HA-  
13 capsid<sup>CTD-fragment</sup>.

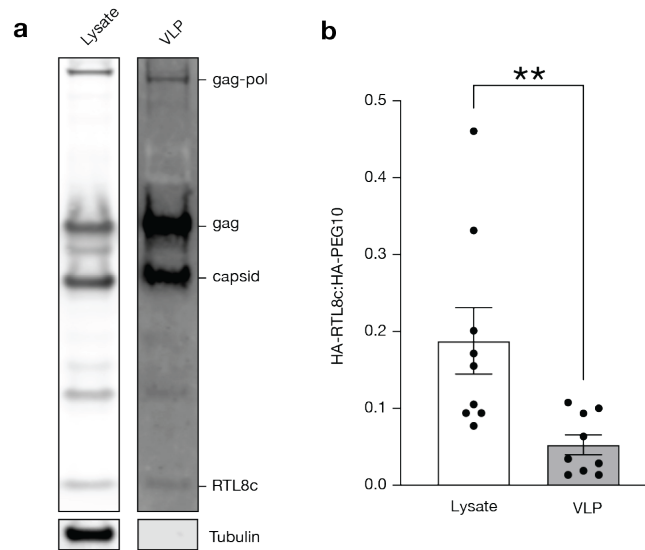

1

2 **Extended Data Fig. 6: PEG10 VLPs released into media contain a low level of RTL8 incorporation.**

3 **a)** Representative western blots of lysate (left) and VLP (right) samples prepared from cells expressing  
4 HA-tagged PEG10 and HA-tagged RTL8c. HA antibody was used to detect proteins, which were  
5 identified as either PEG10 or RTL8 based on molecular weight. Data are representative of 5 independent  
6 experiments. **b)** Quantification of HA-RTL8c:HA-PEG10 ratio in lysate and VLP upon co-expression.  
7 RTL8 is less abundant in VLPs compared to lysate and is present in VLPs at less than 10% of PEG10  
8 levels on average. Data were analyzed by Student's t-test. \*\*p<0.01.

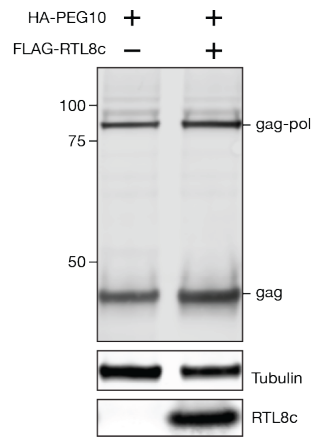

1

2 **Extended Data Fig. 7: Co-expression of RTL8 with PEG10 does not measurably influence PEG10**

3 **levels in lysate by western blot.** Representative western blot showing HA-PEG10 and FLAG-RTL8c

4 levels upon co-expression.

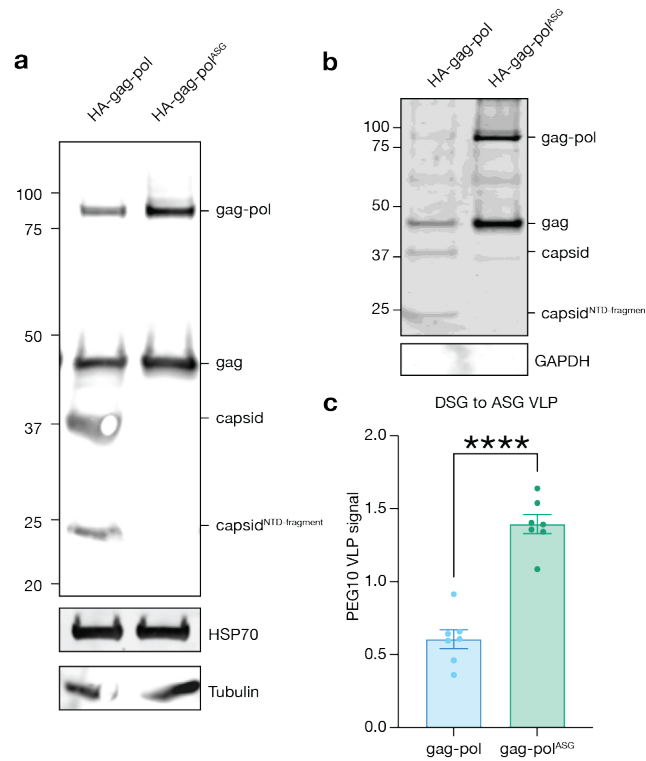

1

2 **Extended Data Fig. 8: Loss of PEG10 protease activity increases VLP abundance.** a) Western blot  
3 showing loss of HA-capsid and HA-capsid<sup>NTD-fragment</sup> proteins upon mutation of the PEG10 protease  
4 active site aspartate to alanine. b) Representative western blot showing increased VLP production by  
5 PEG10 HA-gag-pol<sup>ASG</sup> relative to HA-gag-pol<sup>WT</sup>. c) Quantification of VLP production by HA-gag-pol and  
6 HA-gag-pol<sup>ASG</sup>. Data were analyzed by Student's t-test. \*\*\*\*p<0.0001.

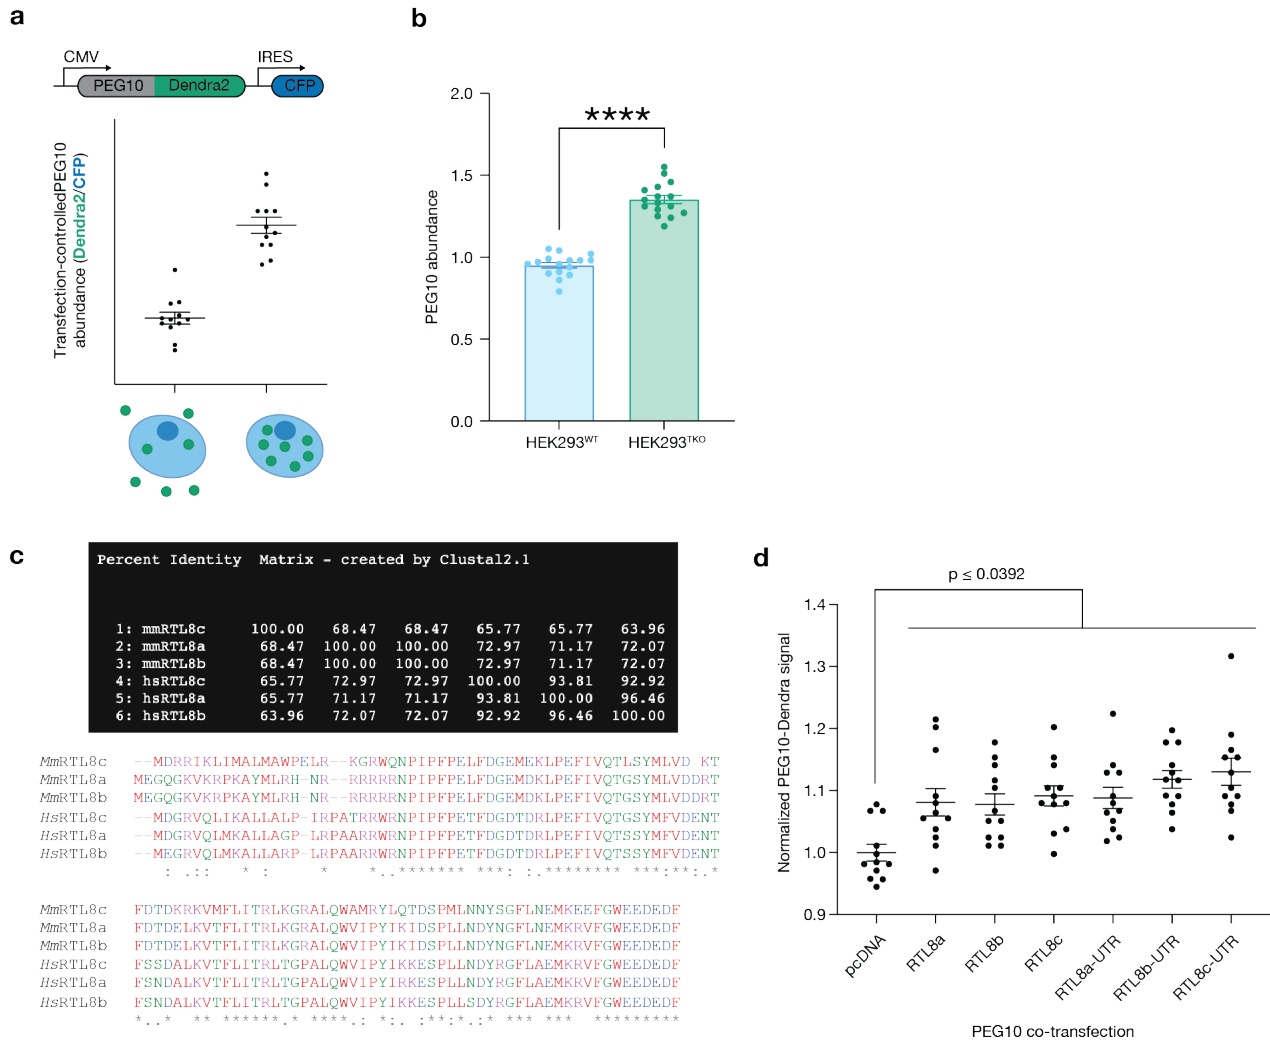

1

2 **Extended Data Fig. 9: Co-expression of RTL8 causes intracellular retention of PEG10.** a) Cartoon  
 3 schematic of PEG10 abundance assay by flow cytometry (simulated data). b) Intracellular PEG10-  
 4 Dendra2 abundance normalized to CFP expression in HEK293<sup>WT</sup> and HEK293<sup>TKO</sup> cells showing  
 5 increased abundance upon loss of UBQLN2. Data were analyzed by Student's t-test. \*\*\*\*p<0.0001. c)  
 6 (top) percent identity matrix and (bottom) protein sequence alignments between human and mouse  
 7 RTL8a, b, c. d) Normalized PEG10-Dendra2 abundance upon mock (pcDNA empty) or FLAG-RTL8a,  
 8 FLAG-RTL8b, or FLAG-RTL8c co-expression, comparing absence or presence of the 3'UTR. Data were  
 9 analyzed by ordinary one-way ANOVA with column means compared to mock transfected.
